# Supplementary material for: Trifunctional lipid derivatives: PE's mitochondrial interactome
Source: Royal Society of Chemistry journal article supplement (doi:10.1039/d4cc03599b), 2024-12-26
Supplement: d4cc03599b1.pdf [file d4cc03599b1.pdf]

## TABLE INTERACTOME

| gene_name | logFC_PA   | logFC_PE   | pvalue_PA | pvalue_PE | hit_annotation_PA  | hit_annotation_PE  |
|-----------|------------|------------|-----------|-----------|--------------------|--------------------|
| MAP4      | -1.7102873 | -2.1282363 | 0.0000132 | 0.0000008 | no hit             | no hit             |
| SEC24C    | -1.3996266 | -1.5440426 | 0.0000189 | 0.0000056 | no hit             | no hit             |
| STRAP     | -1.5509555 | -1.8955412 | 0.0000240 | 0.0000019 | no hit             | no hit             |
| PCBP1     | -1.5867500 | -1.8692164 | 0.0000622 | 0.0000089 | no hit             | no hit             |
| MET       | 1.0225475  | 0.9244389  | 0.0000697 | 0.0002044 | enriched hit       | enriched candidate |
| TPT1      | -1.9047844 | -1.9563568 | 0.0000945 | 0.0000705 | no hit             | no hit             |
| EGFR      | 1.4329414  | 1.4807718  | 0.0000951 | 0.0000662 | enriched hit       | enriched hit       |
| ATXN10    | -1.3980813 | -1.4974015 | 0.0001086 | 0.0000509 | no hit             | no hit             |
| RAB13     | 1.4903360  | 1.4399773  | 0.0001511 | 0.0002155 | enriched hit       | enriched hit       |
| MAPRE1    | -1.7511824 | -1.9126243 | 0.0001529 | 0.0000587 | no hit             | no hit             |
| FAM114A1  | -1.4527281 | -1.6007909 | 0.0001658 | 0.0000580 | no hit             | no hit             |
| SLC30A1   | 1.2417693  | 1.1022616  | 0.0001735 | 0.0005614 | enriched hit       | enriched hit       |
| LANCL1    | 1.0626288  | 0.7065839  | 0.0002058 | 0.0064983 | enriched hit       | enriched candidate |
| L1CAM     | 1.4784112  | 1.3140481  | 0.0002255 | 0.0007020 | enriched hit       | enriched hit       |
| EEF1G     | -1.8482329 | -2.0576506 | 0.0002410 | 0.0000776 | no hit             | no hit             |
| USO1      | -0.9412429 | -0.6719631 | 0.0002413 | 0.0044181 | no hit             | no hit             |
| PDCD6     | -1.8859665 | -2.1370521 | 0.0003295 | 0.0000902 | no hit             | no hit             |
| VPS29     | -1.0191345 | -0.7172935 | 0.0003607 | 0.0064704 | no hit             | no hit             |
| SEC13     | -1.3569496 | -1.6202865 | 0.0003764 | 0.0000588 | no hit             | no hit             |
| EIF4E     | -0.9111330 | -1.1200372 | 0.0004089 | 0.0000466 | no hit             | no hit             |
| PCBP2     | -1.3050835 | -1.6614153 | 0.0004300 | 0.0000331 | no hit             | no hit             |
| EIF2B1    | -0.9708108 | -1.0045364 | 0.0004362 | 0.0003131 | no hit             | no hit             |
| SPCS2     | 1.1806362  | 1.1264986  | 0.0004516 | 0.0006998 | enriched hit       | enriched hit       |
| SEC11A    | 0.9320441  | 0.7949083  | 0.0004619 | 0.0018796 | enriched candidate | enriched candidate |
| NAA50     | -1.2192150 | -1.2449251 | 0.0004681 | 0.0003832 | no hit             | no hit             |
| GNAI1     | 1.0962794  | 0.9991076  | 0.0005795 | 0.0013233 | enriched hit       | enriched candidate |
| TMEM214   | 1.5019694  | 1.4725462  | 0.0006800 | 0.0008135 | enriched hit       | enriched hit       |
| COPE      | -0.7396678 | -1.0079993 | 0.0006801 | 0.0000264 | no hit             | no hit             |
| EPHB4     | 0.8741008  | 0.9153067  | 0.0006809 | 0.0004426 | enriched candidate | enriched candidate |
| ATXN2L    | -1.2994512 | -1.7866263 | 0.0007103 | 0.0000252 | no hit             | no hit             |
| GNAI2     | 1.0018102  | 0.8476414  | 0.0008882 | 0.0034789 | enriched hit       | enriched candidate |
| SLC9A3R1  | 1.2805822  | 1.4100435  | 0.0011358 | 0.0004743 | enriched hit       | enriched hit       |
| BZW1      | -1.3116651 | -1.3766574 | 0.0011635 | 0.0007590 | no hit             | no hit             |
| ABCC1     | 0.7114526  | 0.7618172  | 0.0012429 | 0.0006783 | enriched candidate | enriched candidate |
| PDCD6IP   | -1.0900299 | -0.8838015 | 0.0012865 | 0.0063745 | no hit             | no hit             |
| RALA      | 1.1455485  | 1.3715065  | 0.0012948 | 0.0002427 | enriched hit       | enriched hit       |
| ARF4      | -0.7899130 | -0.7036164 | 0.0014075 | 0.0035243 | no hit             | no hit             |
| NPM1      | 0.9090801  | 0.8472015  | 0.0014406 | 0.0025504 | enriched candidate | enriched candidate |
| RAB23     | 0.6729241  | 0.4513435  | 0.0016281 | 0.0232187 | enriched candidate | no hit             |
| PARVA     | -0.8810579 | -0.7908037 | 0.0016454 | 0.0038259 | no hit             | no hit             |
| SEC23A    | -1.0161021 | -1.0629142 | 0.0018440 | 0.0012664 | no hit             | no hit             |
| SEC31A    | -1.1761229 | -1.6216455 | 0.0018814 | 0.0000882 | no hit             | no hit             |
| IGF1R     | 0.8272967  | 0.8199912  | 0.0019043 | 0.0020457 | enriched candidate | enriched candidate |
| STOM      | 1.1804349  | 1.2737570  | 0.0019705 | 0.0010394 | enriched hit       | enriched hit       |
| GNA13     | 0.9670985  | 1.0586222  | 0.0021405 | 0.0010034 | enriched candidate | enriched hit       |
| SYAP1     | -1.2244537 | -1.5291549 | 0.0022067 | 0.0003040 | no hit             | no hit             |
| ATP2B1    | 1.0384657  | 1.2540792  | 0.0022216 | 0.0004250 | enriched hit       | enriched hit       |
| YWHAQ     | -1.1744336 | -1.4219177 | 0.0023217 | 0.0004374 | no hit             | no hit             |
| ATP2B4    | 0.7835533  | 0.8851383  | 0.0025009 | 0.0009042 | enriched candidate | enriched candidate |

| gene_name | logFC_PA   | logFC_PE   | pvalue_PA | pvalue_PE | hit_annotation_PA  | hit_annotation_PE  |
|-----------|------------|------------|-----------|-----------|--------------------|--------------------|
| IPO5      | -1.2780783 | -1.3857587 | 0.0026504 | 0.0013759 | no hit             | no hit             |
| ACO1      | -0.9398386 | -0.9656543 | 0.0026515 | 0.0021420 | no hit             | no hit             |
| TARS      | -1.3090394 | -1.2452180 | 0.0026577 | 0.0038755 | no hit             | no hit             |
| SORD      | -1.7193752 | -1.3600723 | 0.0026600 | 0.0131007 | no hit             | no hit             |
| AARS      | -1.0898991 | -1.0073615 | 0.0027365 | 0.0048995 | no hit             | no hit             |
| UBAP2L    | -1.7198342 | -2.1402332 | 0.0028668 | 0.0004357 | no hit             | no hit             |
| IL1RAP    | 0.7931747  | 0.6907412  | 0.0029004 | 0.0077324 | enriched candidate | enriched candidate |
| ARHGDI1   | -1.0157838 | -1.4247269 | 0.0029327 | 0.0001345 | no hit             | no hit             |
| FAM129B   | 1.5349159  | 1.5722074  | 0.0029940 | 0.0024871 | enriched hit       | enriched hit       |
| RRAS2     | 0.8253033  | 0.7508358  | 0.0033333 | 0.0065344 | enriched candidate | enriched candidate |
| SRI       | -1.1956447 | -1.2497933 | 0.0041415 | 0.0029779 | no hit             | no hit             |
| ATP1B1    | 0.8745413  | 1.2597072  | 0.0041624 | 0.0001665 | enriched candidate | enriched hit       |
| PCNA      | -1.1992113 | -1.3561269 | 0.0041739 | 0.0016054 | no hit             | no hit             |
| PPIA      | -0.9861701 | -1.0379672 | 0.0042413 | 0.0028967 | no hit             | no hit             |
| CISD2     | 1.1989323  | 1.5598348  | 0.0043038 | 0.0004798 | enriched candidate | enriched hit       |
| PLIN4     | -0.9154316 | -1.3468834 | 0.0044788 | 0.0001483 | no hit             | no hit             |
| SERPIN1   | -0.9539765 | -1.1727315 | 0.0045716 | 0.0008729 | no hit             | no hit             |
| GNB1      | 0.6925947  | 0.5853194  | 0.0047082 | 0.0139438 | enriched candidate | enriched candidate |
| IST1      | -0.7949002 | -0.5686618 | 0.0049541 | 0.0344595 | no hit             | no hit             |
| PDIA3     | 1.0440225  | 1.2854647  | 0.0051192 | 0.0009913 | enriched candidate | enriched hit       |
| GNAS      | 0.8591344  | 0.9233122  | 0.0052333 | 0.0030950 | enriched candidate | enriched candidate |
| PGLS      | -1.0212386 | -1.1916845 | 0.0054511 | 0.0016900 | no hit             | no hit             |
| ANXA5     | -1.2619308 | -1.4111686 | 0.0056159 | 0.0024635 | no hit             | no hit             |
| ANXA7     | -1.3200992 | -1.5553000 | 0.0061690 | 0.0018104 | no hit             | no hit             |
| TSN       | -0.8431285 | -1.0572653 | 0.0061709 | 0.0010701 | no hit             | no hit             |
| LYPD3     | 0.7343130  | 0.7199076  | 0.0067500 | 0.0076958 | enriched candidate | enriched candidate |
| RHOG      | 0.5404821  | 0.4997986  | 0.0072035 | 0.0118088 | no hit             | no hit             |
| TNPO1     | -0.8815140 | -1.0499972 | 0.0073774 | 0.0020571 | no hit             | no hit             |
| JUP       | 0.9868617  | 0.8219394  | 0.0075067 | 0.0220077 | enriched candidate | enriched candidate |
| RAC1      | 0.9171846  | 0.9021876  | 0.0077608 | 0.0086338 | enriched candidate | enriched candidate |
| RCN1      | 0.7152582  | 1.3019973  | 0.0078572 | 0.0000349 | enriched candidate | enriched hit       |
| PDIA6     | 0.6981538  | 0.9202651  | 0.0079715 | 0.0009685 | enriched candidate | enriched candidate |
| EEF1B2    | -1.3968312 | -1.7993297 | 0.0080297 | 0.0011948 | no hit             | no hit             |
| EIF4G1    | -1.3069674 | -1.7655515 | 0.0080956 | 0.0007951 | no hit             | no hit             |
| GNB4      | 0.7740150  | 0.7026174  | 0.0081284 | 0.0146772 | enriched candidate | enriched candidate |
| HYOU1     | 1.0490048  | 1.4954338  | 0.0082523 | 0.0004974 | enriched candidate | enriched hit       |
| HSPB1     | -0.8559313 | -1.1778545 | 0.0090629 | 0.0007887 | no hit             | no hit             |
| NDUFA4    | 1.2029840  | 2.1094055  | 0.0090763 | 0.0000690 | enriched candidate | enriched hit       |
| UBE2M     | -1.2063453 | -1.0476949 | 0.0092340 | 0.0209101 | no hit             | no hit             |
| PRDX6     | -1.1222757 | -1.1227733 | 0.0094776 | 0.0094513 | no hit             | no hit             |
| SRPRB     | 1.3048445  | 1.6576933  | 0.0096783 | 0.0017175 | enriched candidate | enriched hit       |
| CD55      | 0.7103563  | 0.8532823  | 0.0097561 | 0.0027128 | enriched candidate | enriched candidate |
| GNA11     | 0.6994555  | 0.6551633  | 0.0104753 | 0.0154319 | enriched candidate | enriched candidate |
| PHGDH     | -0.8681374 | -0.9620424 | 0.0107426 | 0.0054918 | no hit             | no hit             |
| EIF4G2    | -0.9535521 | -1.4050036 | 0.0107689 | 0.0005427 | no hit             | no hit             |
| PGM1      | -1.1487993 | -1.2298332 | 0.0109453 | 0.0070886 | no hit             | no hit             |
| S100A4    | -1.1564389 | -1.5897264 | 0.0114301 | 0.0011082 | no hit             | no hit             |
| DPP3      | -1.0717803 | -0.8187028 | 0.0115417 | 0.0456998 | no hit             | no hit             |
| RABGGTB   | -1.1020058 | -1.3531511 | 0.0115516 | 0.0028302 | no hit             | no hit             |
| API5      | -0.8858819 | -0.5529997 | 0.0118380 | 0.0977886 | no hit             | no hit             |
| PPIB      | 0.8054460  | 1.2116555  | 0.0118508 | 0.0005179 | enriched candidate | enriched hit       |
| CANX      | 0.7625202  | 0.9614163  | 0.0118849 | 0.0023895 | enriched candidate | enriched candidate |

| gene_name         | logFC_PA   | logFC_PE   | pvalue_PA | pvalue_PE | hit_annotation_PA  | hit_annotation_PE  |
|-------------------|------------|------------|-----------|-----------|--------------------|--------------------|
| YWHAZ             | -0.8795410 | -1.3062261 | 0.0120203 | 0.0005970 | no hit             | no hit             |
| SFN               | -1.0509365 | -1.3210768 | 0.0121962 | 0.0025308 | no hit             | no hit             |
| NARS              | -1.0583062 | -1.2664898 | 0.0125384 | 0.0038066 | no hit             | no hit             |
| IPO7              | -1.0332833 | -1.0718186 | 0.0125476 | 0.0100435 | no hit             | no hit             |
| CRTAP             | 0.7743448  | 1.1324719  | 0.0128594 | 0.0007623 | enriched candidate | enriched hit       |
| PRRC1             | -0.8420595 | -0.9514735 | 0.0128906 | 0.0059171 | no hit             | no hit             |
| GNAQ              | 0.6864202  | 0.6472779  | 0.0130591 | 0.0182277 | enriched candidate | enriched candidate |
| TAGLN2            | -0.8251559 | -1.1475567 | 0.0133704 | 0.0012577 | no hit             | no hit             |
| SRM               | -0.9561359 | -1.0658276 | 0.0133937 | 0.0067780 | no hit             | no hit             |
| LTA4H             | -1.0575724 | -0.8715713 | 0.0136723 | 0.0371187 | no hit             | no hit             |
| HARS              | -0.8074889 | -1.0336960 | 0.0137303 | 0.0025679 | no hit             | no hit             |
| CAND1             | -0.9088526 | -0.3867741 | 0.0137839 | 0.2612188 | no hit             | no hit             |
| FDPS              | -1.0565812 | -1.1397483 | 0.0138986 | 0.0087567 | no hit             | no hit             |
| GSTK1             | 0.9017188  | 1.3693811  | 0.0139953 | 0.0006165 | enriched candidate | enriched hit       |
| ETFB              | 1.0624366  | 1.8921709  | 0.0140953 | 0.0001281 | enriched candidate | enriched hit       |
| LY6K              | 0.8385584  | 1.2372256  | 0.0142151 | 0.0008218 | enriched candidate | enriched hit       |
| NOMO1 NOMO3 NOMO2 | 0.9539389  | 1.3588072  | 0.0146567 | 0.0011730 | enriched candidate | enriched hit       |
| BASP1             | 1.9995488  | 2.4353819  | 0.0148356 | 0.0041320 | enriched candidate | enriched hit       |
| PRKCSH            | 0.6993345  | 0.2732514  | 0.0151703 | 0.3087731 | enriched candidate | no hit             |
| GANAB             | 0.7327816  | 0.9974384  | 0.0155799 | 0.0018765 | enriched candidate | enriched candidate |
| COX4I1            | 0.9876078  | 1.3284838  | 0.0165074 | 0.0022412 | enriched candidate | enriched hit       |
| EIF4B             | -1.6765027 | -2.0360043 | 0.0166077 | 0.0048674 | no hit             | no hit             |
| PLS3              | 0.6927140  | 0.6701795  | 0.0166470 | 0.0199473 | enriched candidate | enriched candidate |
| HSPA9             | 1.2165599  | 1.9695718  | 0.0169997 | 0.0004665 | enriched candidate | enriched hit       |
| CD44              | 0.7504626  | 0.7995567  | 0.0172474 | 0.0119663 | enriched candidate | enriched candidate |
| SLC25A5           | 1.0757471  | 1.9265948  | 0.0178012 | 0.0001863 | enriched candidate | enriched hit       |
| LDHA              | -1.0940288 | -1.1451179 | 0.0179713 | 0.0138860 | no hit             | no hit             |
| CYP51A1           | 0.6923136  | 1.0379720  | 0.0183088 | 0.0010615 | enriched candidate | enriched hit       |
| BST2              | -0.5837096 | -0.8496488 | 0.0183943 | 0.0013782 | no hit             | no hit             |
| SERPINB5          | -1.2072295 | -1.3448798 | 0.0187761 | 0.0100150 | no hit             | no hit             |
| RDH11             | 0.9828302  | 1.1454376  | 0.0190882 | 0.0076554 | enriched candidate | enriched hit       |
| STEAP4            | 0.6904106  | 0.7080156  | 0.0192346 | 0.0167519 | enriched candidate | enriched candidate |
| RAB35             | 0.9938404  | 1.3126777  | 0.0195449 | 0.0032748 | enriched candidate | enriched hit       |
| NUDT5             | -1.1725917 | -1.1996755 | 0.0196409 | 0.0173414 | no hit             | no hit             |
| HPD               | -0.8261069 | -1.1001446 | 0.0197387 | 0.0031206 | no hit             | no hit             |
| FH                | 1.0869163  | 1.9067402  | 0.0201251 | 0.0002889 | enriched candidate | enriched hit       |
| STX4              | 1.1623278  | 1.1191094  | 0.0204003 | 0.0248381 | enriched candidate | enriched candidate |
| PPP2CA            | -0.6038101 | -0.5655153 | 0.0204561 | 0.0285701 | no hit             | no hit             |
| CMBL              | -0.8246131 | -1.0986435 | 0.0205955 | 0.0033027 | no hit             | no hit             |
| AXL               | 0.6605263  | 0.7116850  | 0.0211588 | 0.0139980 | enriched candidate | enriched candidate |
| RAB18             | -0.6475098 | -0.6559605 | 0.0215452 | 0.0201149 | no hit             | no hit             |
| NUTF2             | -0.8619663 | -0.9661471 | 0.0218436 | 0.0114805 | no hit             | no hit             |
| LDHB              | -1.0726842 | -1.2577723 | 0.0218544 | 0.0086771 | no hit             | no hit             |
| ABHD14B           | -0.8417298 | -0.8629057 | 0.0225916 | 0.0198159 | no hit             | no hit             |
| GSTO1             | -1.4148474 | -1.6603257 | 0.0227676 | 0.0090753 | no hit             | no hit             |
| SCCPDH            | 0.7664889  | 1.0578445  | 0.0228555 | 0.0029388 | enriched candidate | enriched hit       |
| GDI2              | -0.6969195 | -0.6372051 | 0.0232498 | 0.0359314 | no hit             | no hit             |
| PNP               | -0.8627469 | -1.0972216 | 0.0232774 | 0.0054741 | no hit             | no hit             |
| PRSS21            | 0.6963114  | 0.9508782  | 0.0233809 | 0.0032925 | enriched candidate | enriched candidate |
| ANP32B            | -1.3860798 | -1.4036057 | 0.0236871 | 0.0221968 | no hit             | no hit             |
| SLC25A6           | 1.1797124  | 1.7670341  | 0.0238151 | 0.0016322 | enriched candidate | enriched hit       |
| CPS1              | 1.0270738  | 1.6495991  | 0.0239479 | 0.0009057 | enriched candidate | enriched hit       |

| gene_name   | logFC_PA   | logFC_PE   | pvalue_PA | pvalue_PE | hit_annotation_PA  | hit_annotation_PE  |
|-------------|------------|------------|-----------|-----------|--------------------|--------------------|
| ANP32A      | -1.1868057 | -1.0616081 | 0.0244341 | 0.0413937 | no hit             | no hit             |
| AIFM1       | 1.0483436  | 1.7119607  | 0.0246193 | 0.0008197 | enriched candidate | enriched hit       |
| TXN         | -0.8956316 | -1.0405750 | 0.0247717 | 0.0107042 | no hit             | no hit             |
| YWHAB       | -0.8802779 | -1.1334477 | 0.0248553 | 0.0054920 | no hit             | no hit             |
| PDHB        | 1.0699200  | 1.7764359  | 0.0248684 | 0.0007183 | enriched candidate | enriched hit       |
| PTGES       | 0.5018075  | 0.5596113  | 0.0250710 | 0.0138701 | no hit             | no hit             |
| PTPRJ       | 0.5950299  | 0.5901194  | 0.0251618 | 0.0262311 | enriched candidate | enriched candidate |
| CLPTM1L     | 1.0283125  | 1.5259723  | 0.0256774 | 0.0019886 | enriched candidate | enriched hit       |
| SCAMP3      | -0.6761965 | -0.7810753 | 0.0257679 | 0.0116302 | no hit             | no hit             |
| CLIC4       | 0.4297073  | 0.2735500  | 0.0265122 | 0.1415954 | no hit             | no hit             |
| PPP2R1A     | -0.9015254 | -0.7913703 | 0.0269971 | 0.0488287 | no hit             | no hit             |
| KRAS        | 0.7409604  | 0.5669426  | 0.0275758 | 0.0833111 | enriched candidate | no hit             |
| ATP5F1      | 0.8173218  | 1.2246776  | 0.0276858 | 0.0020778 | enriched candidate | enriched hit       |
| CLTA        | -0.8395670 | -1.0333273 | 0.0277006 | 0.0085783 | no hit             | no hit             |
| ACAT1       | 1.0392981  | 1.6812198  | 0.0277856 | 0.0011031 | enriched candidate | enriched hit       |
| ATP5C1      | 1.1618019  | 1.8541359  | 0.0279490 | 0.0012522 | enriched candidate | enriched hit       |
| TRAP1       | 1.2101336  | 1.7001014  | 0.0280957 | 0.0035008 | enriched candidate | enriched hit       |
| CD46        | 0.5601800  | 0.2873589  | 0.0281057 | 0.2367035 | no hit             | no hit             |
| UBA1        | -0.8405999 | -0.9717312 | 0.0293119 | 0.0135212 | no hit             | no hit             |
| PSME3       | -0.7459810 | -0.8403125 | 0.0303332 | 0.0163339 | no hit             | no hit             |
| UQCRC2      | 0.9581527  | 1.2745486  | 0.0313243 | 0.0060700 | enriched candidate | enriched hit       |
| PLIN3       | -1.0299114 | -1.3996025 | 0.0315516 | 0.0052927 | no hit             | no hit             |
| ADPGK       | 0.4577273  | 0.5923353  | 0.0316733 | 0.0074157 | no hit             | enriched candidate |
| YBX1        | -1.7691166 | -1.5395923 | 0.0320330 | 0.0582983 | no hit             | no hit             |
| ICAM1       | 0.6716955  | 0.6189284  | 0.0323045 | 0.0465526 | enriched candidate | enriched candidate |
| TUBB4B      | -0.6867938 | -0.6738949 | 0.0324495 | 0.0354415 | no hit             | no hit             |
| APOL2       | 0.7718817  | 0.8687097  | 0.0326253 | 0.0178734 | enriched candidate | enriched candidate |
| SAR1A       | -0.7370703 | -0.5664139 | 0.0327720 | 0.0925463 | no hit             | no hit             |
| YWHAE       | -0.7459078 | -0.9455276 | 0.0330316 | 0.0089787 | no hit             | no hit             |
| ACTC1 ACTA1 | 0.8024025  | 1.1429917  | 0.0333403 | 0.0041133 | enriched candidate | enriched hit       |
| SSR4        | 0.5855332  | 0.7930475  | 0.0335823 | 0.0059367 | enriched candidate | enriched candidate |
| GPI         | -0.7734076 | -0.4952956 | 0.0336305 | 0.1582710 | no hit             | no hit             |
| ABCG2       | 1.2601713  | 1.3966358  | 0.0336884 | 0.0201581 | enriched candidate | enriched candidate |
| CALM1       | 0.7661187  | 0.5945353  | 0.0337566 | 0.0915021 | enriched candidate | no hit             |
| IGSF8       | 0.8283054  | 0.7600261  | 0.0340433 | 0.0496476 | enriched candidate | enriched candidate |
| PGD         | -0.8701061 | -0.7006273 | 0.0341524 | 0.0815206 | no hit             | no hit             |
| CD58        | 0.7876075  | 0.6673019  | 0.0347561 | 0.0689490 | enriched candidate | enriched candidate |
| SERPINB6    | -0.7724718 | -1.0582488 | 0.0363172 | 0.0061664 | no hit             | no hit             |
| PGAM1       | -1.0205799 | -1.0660334 | 0.0364536 | 0.0297145 | no hit             | no hit             |
| HSD17B4     | 0.7042386  | 1.1843335  | 0.0365094 | 0.0012970 | enriched candidate | enriched hit       |
| PLXNB2      | 0.5541265  | 0.6764503  | 0.0367329 | 0.0130200 | no hit             | enriched candidate |
| ATP5O       | 0.9459344  | 1.6234003  | 0.0378524 | 0.0011672 | enriched candidate | enriched hit       |
| GLUD1       | 1.1635431  | 1.4708045  | 0.0378675 | 0.0109963 | enriched candidate | enriched candidate |
| SRPRA       | 0.8512058  | 0.8844125  | 0.0392771 | 0.0329737 | enriched candidate | enriched candidate |
| CACYBP      | -0.8579596 | -0.9174785 | 0.0393082 | 0.0287563 | no hit             | no hit             |
| TFG         | -1.1244618 | -1.1206098 | 0.0396581 | 0.0402656 | no hit             | no hit             |
| BTF3        | -1.2375595 | -1.7200158 | 0.0404243 | 0.0065740 | no hit             | no hit             |
| ZNF598      | -0.7775675 | -0.9992775 | 0.0410730 | 0.0111141 | no hit             | no hit             |
| S100A6      | -1.3047142 | -1.6077461 | 0.0411125 | 0.0142806 | no hit             | no hit             |
| S100A11     | -1.3524704 | -2.2091287 | 0.0412764 | 0.0020713 | no hit             | no hit             |
| TALDO1      | -1.3120526 | -1.6459841 | 0.0413439 | 0.0129596 | no hit             | no hit             |
| NPEPPS      | -0.6058937 | -0.5433176 | 0.0414172 | 0.0645348 | no hit             | no hit             |

| gene_name | logFC_PA   | logFC_PE   | pvalue_PA | pvalue_PE | hit_annotation_PA  | hit_annotation_PE  |
|-----------|------------|------------|-----------|-----------|--------------------|--------------------|
| GNAI3     | 0.8393447  | 0.9391857  | 0.0415973 | 0.0244602 | enriched candidate | enriched candidate |
| FKBP4     | -0.6903636 | -0.3854934 | 0.0416527 | 0.2367259 | no hit             | no hit             |
| PTGR1     | -0.7531171 | -0.9903760 | 0.0417106 | 0.0098556 | no hit             | no hit             |
| SERBP1    | -1.8079280 | -2.5061499 | 0.0427470 | 0.0072845 | no hit             | no hit             |
| CSE1L     | -0.8647388 | -0.7954495 | 0.0431564 | 0.0607079 | no hit             | no hit             |
| MIF       | -1.0441700 | -1.4407526 | 0.0435434 | 0.0077227 | no hit             | no hit             |
| ECH1      | 1.0900183  | 1.5722015  | 0.0437041 | 0.0057688 | enriched candidate | enriched hit       |
| B4GALT1   | -0.7047253 | -0.8345779 | 0.0438584 | 0.0193717 | no hit             | no hit             |
| ANXA1     | -0.5224248 | -0.2255554 | 0.0441086 | 0.3627332 | no hit             | no hit             |
| CTTN      | 0.9015442  | 0.8124718  | 0.0445032 | 0.0673960 | enriched candidate | enriched candidate |
| PTGFRN    | 0.7274874  | 0.5533771  | 0.0448288 | 0.1184281 | enriched candidate | no hit             |
| IQGAP1    | 1.3980589  | 1.3611695  | 0.0448654 | 0.0501907 | enriched candidate | enriched candidate |
| TXNDC5    | 0.6153251  | 0.8399299  | 0.0449580 | 0.0086885 | enriched candidate | enriched candidate |
| MDH2      | 0.8705424  | 1.3314963  | 0.0449768 | 0.0039903 | enriched candidate | enriched hit       |
| UQCRC1    | 0.7136781  | 1.1517412  | 0.0451219 | 0.0026798 | enriched candidate | enriched hit       |
| MYL6      | 0.5961698  | 0.5520476  | 0.0457694 | 0.0623811 | enriched candidate | no hit             |
| PUF60     | -0.4712617 | -0.4207790 | 0.0460849 | 0.0718511 | no hit             | no hit             |
| RDX       | 1.3039637  | 1.1493159  | 0.0461561 | 0.0753589 | enriched candidate | enriched candidate |
| GNG12     | 0.5021224  | 0.2823064  | 0.0462213 | 0.2445786 | no hit             | no hit             |
| ATP5A1    | 0.8481773  | 1.6104386  | 0.0485491 | 0.0007948 | no hit             | enriched hit       |
| RAP1A     | 0.5320556  | 0.7579538  | 0.0490914 | 0.0075436 | no hit             | enriched candidate |
| AGL       | -1.0040286 | -1.2029550 | 0.0494766 | 0.0212008 | no hit             | no hit             |
| SKP1      | -0.7393452 | -0.8009505 | 0.0498820 | 0.0351854 | no hit             | no hit             |
| GLOD4     | -0.8477743 | -0.9762664 | 0.0500377 | 0.0263486 | no hit             | no hit             |
| TXNRD1    | -0.6101066 | -0.6128501 | 0.0505713 | 0.0496451 | no hit             | no hit             |
| RPN2      | 0.7968537  | 1.3097488  | 0.0507365 | 0.0028882 | no hit             | enriched hit       |
| PPP1CA    | 0.4903157  | 0.3873057  | 0.0512769 | 0.1165183 | no hit             | no hit             |
| HSPH1     | -0.5318265 | -0.4065802 | 0.0531840 | 0.1311818 | no hit             | no hit             |
| SLC25A24  | 0.9698108  | 1.1350588  | 0.0535950 | 0.0264327 | no hit             | enriched candidate |
| KPNB1     | -0.6698115 | -0.6399123 | 0.0538990 | 0.0643890 | no hit             | no hit             |
| TM9SF2    | -0.9274344 | -1.0517459 | 0.0541365 | 0.0312049 | no hit             | no hit             |
| HSPA4     | -0.7347511 | -0.4536348 | 0.0542675 | 0.2200571 | no hit             | no hit             |
| ITGA6     | 0.6160650  | 0.5598786  | 0.0546545 | 0.0781872 | no hit             | no hit             |
| DHCR7     | 0.8628836  | 1.1478017  | 0.0555554 | 0.0139149 | no hit             | enriched candidate |
| BPNT1     | -0.5667511 | -0.5567825 | 0.0562577 | 0.0603012 | no hit             | no hit             |
| YWHAH     | -0.7761973 | -1.1368576 | 0.0565507 | 0.0079065 | no hit             | no hit             |
| NMT1      | -1.1620870 | -1.7092048 | 0.0570214 | 0.0077993 | no hit             | no hit             |
| RP2       | 0.6859755  | 0.4805714  | 0.0590441 | 0.1751859 | no hit             | no hit             |
| CIB1      | 0.4424269  | 0.0767560  | 0.0602315 | 0.7321770 | no hit             | no hit             |
| TRIM28    | 0.6867347  | 0.7648885  | 0.0605151 | 0.0386461 | no hit             | enriched candidate |
| MSLN      | 0.5925356  | 0.4150970  | 0.0607018 | 0.1781403 | no hit             | no hit             |
| NECTIN2   | 0.4771873  | 0.2047078  | 0.0613481 | 0.4035085 | no hit             | no hit             |
| AKR1B1    | -0.7648907 | -0.9349887 | 0.0617305 | 0.0254600 | no hit             | no hit             |
| SLC25A3   | 0.8302348  | 1.5530089  | 0.0623183 | 0.0015558 | no hit             | enriched hit       |
| ADAM10    | 0.4694021  | 0.7025148  | 0.0627386 | 0.0081764 | no hit             | enriched candidate |
| TPD52L2   | -0.7235519 | -1.0737492 | 0.0629491 | 0.0086830 | no hit             | no hit             |
| GTF2I     | 0.7782688  | 1.0808547  | 0.0631256 | 0.0131048 | no hit             | enriched candidate |
| PPIF      | 0.9239184  | 1.6091492  | 0.0645972 | 0.0029664 | no hit             | enriched hit       |
| HMOX2     | 0.4829780  | 0.5548688  | 0.0668045 | 0.0378085 | no hit             | no hit             |
| GOLT1B    | -0.5355459 | -0.5745379 | 0.0676244 | 0.0514464 | no hit             | no hit             |
| PARK7     | -0.7473461 | -0.8083441 | 0.0691631 | 0.0510112 | no hit             | no hit             |
| ACO2      | 0.6691561  | 1.0844205  | 0.0696929 | 0.0058022 | no hit             | enriched hit       |

| gene_name     | logFC_PA   | logFC_PE   | pvalue_PA | pvalue_PE | hit_annotation_PA | hit_annotation_PE  |
|---------------|------------|------------|-----------|-----------|-------------------|--------------------|
| YWHAG         | -0.4642422 | -0.8470333 | 0.0697281 | 0.0024270 | no hit            | no hit             |
| ETFA          | 0.7791291  | 1.1731190  | 0.0700165 | 0.0094913 | no hit            | enriched candidate |
| WDR1          | 1.1206443  | 1.1555536  | 0.0702509 | 0.0626577 | no hit            | enriched candidate |
| SHMT2         | 1.1096423  | 1.8917486  | 0.0715130 | 0.0042664 | no hit            | enriched hit       |
| GNG5          | 0.5357813  | 0.3309812  | 0.0717179 | 0.2527440 | no hit            | no hit             |
| AP1B1         | -0.4693235 | -0.8364574 | 0.0726385 | 0.0031716 | no hit            | no hit             |
| RAB31         | 0.4759150  | 0.6653932  | 0.0729057 | 0.0157856 | no hit            | enriched candidate |
| RBBP4         | 0.5423190  | 0.2505057  | 0.0732154 | 0.3913247 | no hit            | no hit             |
| ATP1A1        | 0.5687790  | 0.8566751  | 0.0735322 | 0.0103066 | no hit            | enriched candidate |
| SDHA          | 0.9086139  | 1.6885254  | 0.0736665 | 0.0023670 | no hit            | enriched hit       |
| POR           | 0.6752719  | 1.2822349  | 0.0747595 | 0.0020604 | no hit            | enriched hit       |
| EIF5A         | -1.3670257 | -1.6858074 | 0.0755064 | 0.0318463 | no hit            | no hit             |
| LIFR          | 0.4648637  | 0.4255133  | 0.0757462 | 0.1016881 | no hit            | no hit             |
| MME           | -0.4869324 | -0.9887385 | 0.0762257 | 0.0012362 | no hit            | no hit             |
| ITGA5         | 0.6907537  | 0.6910638  | 0.0768046 | 0.0766832 | no hit            | enriched candidate |
| SFXN1         | 0.8439585  | 1.3278179  | 0.0772622 | 0.0085487 | no hit            | enriched hit       |
| PPA1          | -0.9022483 | -1.0180095 | 0.0774740 | 0.0488178 | no hit            | no hit             |
| RAP2C         | 0.4012618  | 0.4555885  | 0.0779790 | 0.0479289 | no hit            | no hit             |
| GLO1          | -0.9432437 | -1.2287457 | 0.0804913 | 0.0266674 | no hit            | no hit             |
| PA2G4         | -1.0323648 | -1.3580830 | 0.0813144 | 0.0257705 | no hit            | no hit             |
| DSG2          | 0.5092099  | 0.5182017  | 0.0815305 | 0.0767096 | no hit            | no hit             |
| LAMC1         | 0.5137819  | 0.2155576  | 0.0816605 | 0.4493452 | no hit            | no hit             |
| GSTM3         | -0.7007375 | -0.4917216 | 0.0820878 | 0.2127673 | no hit            | no hit             |
| GOT2          | 0.8470544  | 1.5142310  | 0.0823144 | 0.0040398 | no hit            | enriched hit       |
| SLC43A3       | 0.5485201  | 0.0663466  | 0.0826897 | 0.8267207 | no hit            | no hit             |
| OXCT1         | 0.6595150  | 1.3439306  | 0.0831710 | 0.0014839 | no hit            | enriched hit       |
| CS            | 1.4016306  | 2.2800407  | 0.0834149 | 0.0079509 | no hit            | enriched hit       |
| PRDX1         | -0.8641678 | -1.0643709 | 0.0842449 | 0.0370733 | no hit            | no hit             |
| USP14         | -0.6021440 | -0.7050309 | 0.0850444 | 0.0468237 | no hit            | no hit             |
| RMDN1         | 0.7151034  | 1.2567316  | 0.0852800 | 0.0049203 | no hit            | enriched hit       |
| PGK1          | -0.7322022 | -0.8622865 | 0.0870973 | 0.0470823 | no hit            | no hit             |
| BUB3          | -0.4248345 | -0.3829254 | 0.0872845 | 0.1205178 | no hit            | no hit             |
| HSP90B1       | 0.8768021  | 1.3699159  | 0.0874302 | 0.0111871 | no hit            | enriched candidate |
| UBXN4         | 0.5163635  | 0.6651792  | 0.0887183 | 0.0323534 | no hit            | enriched candidate |
| CAPZA1        | -0.5595352 | -0.3641191 | 0.0889270 | 0.2573339 | no hit            | no hit             |
| ACSL3         | 1.0994523  | 1.4123138  | 0.0890577 | 0.0329646 | no hit            | enriched candidate |
| SLC44A2       | 0.8047551  | 0.7306552  | 0.0904399 | 0.1217162 | no hit            | no hit             |
| PEBP1         | -1.0342547 | -1.3508123 | 0.0915596 | 0.0317146 | no hit            | no hit             |
| TRMT10C       | 0.7804957  | 1.3265029  | 0.0921464 | 0.0072551 | no hit            | enriched hit       |
| NEGR1         | 0.3925125  | 0.2330619  | 0.0943592 | 0.3084358 | no hit            | no hit             |
| MLEC          | 0.5586669  | 0.9309872  | 0.0946951 | 0.0087084 | no hit            | enriched candidate |
| QARS          | 0.3944565  | 0.2932767  | 0.0972788 | 0.2099295 | no hit            | no hit             |
| ENO1          | -0.6567392 | -0.5858189 | 0.0973372 | 0.1361995 | no hit            | no hit             |
| GDA           | -0.6464967 | -0.6086386 | 0.0986695 | 0.1184982 | no hit            | no hit             |
| RPS28         | -0.6225026 | -0.9282649 | 0.0987896 | 0.0181941 | no hit            | no hit             |
| ARFGAP1       | -0.5605887 | -0.9075345 | 0.0993044 | 0.0114400 | no hit            | no hit             |
| ECI1          | 0.8083904  | 1.1499630  | 0.1000294 | 0.0238445 | no hit            | enriched candidate |
| DAG1          | 0.6328029  | 0.4841418  | 0.1001741 | 0.2015386 | no hit            | no hit             |
| F11R          | 0.6703346  | 0.5786599  | 0.1011202 | 0.1531764 | no hit            | no hit             |
| TUFM          | 1.1617206  | 1.7057189  | 0.1027527 | 0.0211509 | no hit            | enriched candidate |
| HSPA1B HSPA1A | -0.4351823 | -0.1209898 | 0.1032678 | 0.6391645 | no hit            | no hit             |
| MAT2A         | -0.6444786 | -0.7286590 | 0.1032697 | 0.0681141 | no hit            | no hit             |

| gene_name | logFC_PA   | logFC_PE   | pvalue_PA | pvalue_PE | hit_annotation_PA | hit_annotation_PE  |
|-----------|------------|------------|-----------|-----------|-------------------|--------------------|
| SLC1A5    | 0.4066043  | 0.1795620  | 0.1039616 | 0.4594581 | no hit            | no hit             |
| ALDH3A2   | 0.7284483  | 1.1699565  | 0.1045580 | 0.0132371 | no hit            | enriched candidate |
| PRDX3     | 1.1454577  | 1.5097689  | 0.1060583 | 0.0376813 | no hit            | enriched candidate |
| CLINT1    | -1.0843148 | -1.6696676 | 0.1061654 | 0.0173164 | no hit            | no hit             |
| CAPN2     | -0.4646363 | -0.3366213 | 0.1093045 | 0.2381256 | no hit            | no hit             |
| CD59      | 0.5405265  | 0.5149523  | 0.1099009 | 0.1265537 | no hit            | no hit             |
| ATL2      | 0.5416945  | 0.7326634  | 0.1101676 | 0.0354658 | no hit            | enriched candidate |
| EIF3M     | -0.5956659 | -0.7569095 | 0.1116491 | 0.0475652 | no hit            | no hit             |
| MYDGF     | 0.6411100  | 0.4473981  | 0.1119904 | 0.2588817 | no hit            | no hit             |
| CAPRN1    | -1.1131676 | -1.8752007 | 0.1139290 | 0.0118013 | no hit            | no hit             |
| DLD       | 0.9607469  | 1.4164378  | 0.1139656 | 0.0247059 | no hit            | enriched candidate |
| RAN       | -0.3879245 | -0.1126817 | 0.1141586 | 0.6355767 | no hit            | no hit             |
| GIGYF2    | -0.8588753 | -1.3041414 | 0.1155944 | 0.0217537 | no hit            | no hit             |
| DSP       | -0.7004315 | -0.8915726 | 0.1169136 | 0.0503811 | no hit            | no hit             |
| LSS       | 0.3643852  | 0.4395606  | 0.1178693 | 0.0630021 | no hit            | no hit             |
| CDH10     | 0.5228095  | 0.4905615  | 0.1191043 | 0.1420662 | no hit            | no hit             |
| SLC38A5   | 0.5757868  | 0.3688671  | 0.1195638 | 0.3091078 | no hit            | no hit             |
| USP10     | -0.7552357 | -1.2279646 | 0.1196238 | 0.0159862 | no hit            | no hit             |
| MCAM      | 0.7428621  | 0.8024138  | 0.1198088 | 0.0946603 | no hit            | no hit             |
| MSN       | 1.4877823  | 1.3495103  | 0.1198543 | 0.1558913 | no hit            | no hit             |
| TLN1      | 0.4964995  | 0.5474012  | 0.1200941 | 0.0887615 | no hit            | no hit             |
| ALG5      | 0.6799184  | 1.0268735  | 0.1205670 | 0.0241057 | no hit            | enriched candidate |
| SUPT16H   | 0.3565489  | 0.2253326  | 0.1207534 | 0.3171152 | no hit            | no hit             |
| CCT8      | 0.5130406  | 0.1856713  | 0.1210070 | 0.5633561 | no hit            | no hit             |
| MMP15     | 0.4099008  | 0.2804082  | 0.1213524 | 0.2807919 | no hit            | no hit             |
| ADAM9     | 0.4688802  | 0.5977875  | 0.1214535 | 0.0528125 | no hit            | enriched candidate |
| TAPBP     | 0.5379738  | 1.0205991  | 0.1215162 | 0.0063619 | no hit            | enriched hit       |
| BZW2      | -0.5642821 | -0.3594154 | 0.1219288 | 0.3150239 | no hit            | no hit             |
| DDOST     | 0.5872560  | 0.8253849  | 0.1225850 | 0.0351435 | no hit            | enriched candidate |
| EPB41L2   | 0.9540247  | 0.9189382  | 0.1226985 | 0.1361664 | no hit            | no hit             |
| SUCLG2    | 0.8475886  | 1.2854421  | 0.1232421 | 0.0245393 | no hit            | enriched candidate |
| LRPPRC    | 0.8803241  | 1.4431776  | 0.1235478 | 0.0162604 | no hit            | enriched candidate |
| G3BP2     | -1.3005146 | -1.7375196 | 0.1238397 | 0.0447151 | no hit            | no hit             |
| RPN1      | 0.9055281  | 1.2928639  | 0.1245692 | 0.0335417 | no hit            | enriched candidate |
| RAB8A     | 0.3653774  | 0.3123164  | 0.1251734 | 0.1861486 | no hit            | no hit             |
| C17orf75  | -0.3864451 | -0.4159497 | 0.1263078 | 0.1015336 | no hit            | no hit             |
| HNRNPA2B1 | -0.5177406 | -0.4120945 | 0.1267995 | 0.2188629 | no hit            | no hit             |
| CAPZB     | -0.4487241 | -0.2896496 | 0.1270582 | 0.3155881 | no hit            | no hit             |
| HSD17B10  | 0.6434498  | 0.9512938  | 0.1279775 | 0.0297473 | no hit            | enriched candidate |
| FLOT2     | 0.7160830  | 0.7804755  | 0.1282138 | 0.0992654 | no hit            | no hit             |
| VDAC2     | 0.6761461  | 0.7611357  | 0.1286019 | 0.0897448 | no hit            | no hit             |
| SLIRP     | 0.8045309  | 1.4909460  | 0.1291731 | 0.0085609 | no hit            | enriched hit       |
| ANXA3     | -0.6137583 | -0.8338470 | 0.1298005 | 0.0447137 | no hit            | no hit             |
| STT3A     | 0.5832009  | 1.0951797  | 0.1305010 | 0.0080497 | no hit            | enriched hit       |
| COX5A     | 0.6865719  | 1.0359832  | 0.1308077 | 0.0279850 | no hit            | enriched candidate |
| CD320     | 0.3318795  | 0.5271437  | 0.1317788 | 0.0218707 | no hit            | no hit             |
| EIF4A1    | -1.0769287 | -1.4921220 | 0.1320805 | 0.0422135 | no hit            | no hit             |
| HSPA5     | 0.7608667  | 1.0473646  | 0.1340677 | 0.0444530 | no hit            | enriched candidate |
| ARL15     | 0.4211931  | 0.4453741  | 0.1348650 | 0.1151489 | no hit            | no hit             |
| FAM234A   | 0.4876238  | 0.1647107  | 0.1354343 | 0.6041060 | no hit            | no hit             |
| SGTA      | -0.6912632 | -1.0949960 | 0.1355253 | 0.0233942 | no hit            | no hit             |
| ACTR3     | 0.7209652  | 0.7582484  | 0.1361174 | 0.1181581 | no hit            | no hit             |

| gene_name          | logFC_PA   | logFC_PE   | pvalue_PA | pvalue_PE | hit_annotation_PA | hit_annotation_PE  |
|--------------------|------------|------------|-----------|-----------|-------------------|--------------------|
| GPX8               | 0.7813264  | 0.8794929  | 0.1384419 | 0.0979550 | no hit            | no hit             |
| NSDHL              | 0.6104310  | 0.9967437  | 0.1396551 | 0.0211687 | no hit            | enriched candidate |
| SAE1               | -0.6869693 | -0.9734499 | 0.1399645 | 0.0420202 | no hit            | no hit             |
| TPI1               | -0.8752863 | -1.3146029 | 0.1403100 | 0.0324097 | no hit            | no hit             |
| GNB2               | 0.9235087  | 1.1148611  | 0.1415669 | 0.0798367 | no hit            | no hit             |
| PHB                | 1.0004014  | 1.5166908  | 0.1415971 | 0.0315096 | no hit            | enriched candidate |
| ALDOC              | -0.4623600 | -0.3477376 | 0.1417159 | 0.2629377 | no hit            | no hit             |
| DNPH1              | -0.5491632 | -0.8279897 | 0.1432261 | 0.0330101 | no hit            | no hit             |
| BSG                | 0.7674527  | 0.5553078  | 0.1432631 | 0.2827719 | no hit            | no hit             |
| NUDT21             | 0.3128488  | 0.4548815  | 0.1436832 | 0.0391836 | no hit            | no hit             |
| CNOT1              | -0.9773670 | -1.1739267 | 0.1438879 | 0.0829808 | no hit            | no hit             |
| EZR                | 1.2053525  | 0.9549854  | 0.1447796 | 0.2428373 | no hit            | no hit             |
| RPS12              | -0.5167728 | -0.8568059 | 0.1453146 | 0.0211430 | no hit            | no hit             |
| ERP29              | 0.8413553  | 1.0042259  | 0.1453974 | 0.0859217 | no hit            | no hit             |
| RHOA               | 0.3476848  | 0.1425033  | 0.1455950 | 0.5409533 | no hit            | no hit             |
| FLOT1              | 0.7270289  | 0.7289149  | 0.1458074 | 0.1448243 | no hit            | no hit             |
| KDELC2             | 0.4823694  | 0.5089700  | 0.1460138 | 0.1262608 | no hit            | no hit             |
| GCN1               | -1.0153633 | -1.3456809 | 0.1481564 | 0.0604547 | no hit            | no hit             |
| STX6               | -0.3582669 | -0.5070005 | 0.1487628 | 0.0466926 | no hit            | no hit             |
| GSS                | -0.5830147 | -0.7431179 | 0.1490047 | 0.0705628 | no hit            | no hit             |
| RPS10              | -1.0015419 | -1.6051252 | 0.1493796 | 0.0265737 | no hit            | no hit             |
| CPM                | 0.6025927  | 0.6217837  | 0.1507395 | 0.1388656 | no hit            | no hit             |
| NAA15              | -1.1184321 | -1.2229087 | 0.1511476 | 0.1184855 | no hit            | no hit             |
| SBDS               | -0.6783491 | -0.9443653 | 0.1515137 | 0.0514816 | no hit            | no hit             |
| DKFzp566H1924 NPTN | 0.7993142  | 0.6960397  | 0.1515462 | 0.2086499 | no hit            | no hit             |
| CNP                | 1.0902907  | 0.9573946  | 0.1517786 | 0.2052775 | no hit            | no hit             |
| PLOD3              | 0.7053834  | 0.7502766  | 0.1517808 | 0.1287650 | no hit            | no hit             |
| SYNGR2             | -0.5886332 | -0.7269089 | 0.1522276 | 0.0813050 | no hit            | no hit             |
| TUBB               | -0.6155474 | -0.7689170 | 0.1551852 | 0.0802265 | no hit            | no hit             |
| HSPD1              | 0.9014326  | 1.9121910  | 0.1561475 | 0.0056146 | no hit            | enriched hit       |
| TPP2               | 0.8148830  | 0.9129634  | 0.1562630 | 0.1146645 | no hit            | no hit             |
| PSME2              | -0.6709449 | -0.7246149 | 0.1574189 | 0.1284819 | no hit            | no hit             |
| TMEM43             | 0.3461815  | 0.6961019  | 0.1575705 | 0.0082253 | no hit            | enriched candidate |
| FOLR1              | 0.7011765  | 0.5161595  | 0.1580814 | 0.2926925 | no hit            | no hit             |
| MDH1               | -0.5272863 | -0.7207143 | 0.1583154 | 0.0593683 | no hit            | no hit             |
| PMPCB              | 0.6668214  | 1.0407801  | 0.1590304 | 0.0340044 | no hit            | enriched candidate |
| COLGALT1           | 0.8325576  | 0.9915497  | 0.1591766 | 0.0972406 | no hit            | no hit             |
| ARPC3              | 0.3714443  | 0.3898731  | 0.1598194 | 0.1411710 | no hit            | no hit             |
| ATP5H              | 0.8068191  | 1.3281275  | 0.1600204 | 0.0266435 | no hit            | enriched candidate |
| LGALS1             | 0.4184166  | 0.3770910  | 0.1604680 | 0.2036356 | no hit            | no hit             |
| RTN4RL2            | 0.4518794  | 0.1716733  | 0.1605016 | 0.5851250 | no hit            | no hit             |
| CAPZA2             | -0.3140864 | -0.2204797 | 0.1619901 | 0.3196500 | no hit            | no hit             |
| TPM3 DKFzp686J1372 | 0.6399644  | 0.7849955  | 0.1623590 | 0.0907110 | no hit            | no hit             |
| FAM120A            | -0.6677745 | -1.0003940 | 0.1667286 | 0.0445130 | no hit            | no hit             |
| ATP11C             | 0.3302766  | 0.3856727  | 0.1685136 | 0.1110997 | no hit            | no hit             |
| CNPY3              | 0.4335020  | 0.3995845  | 0.1691744 | 0.2033025 | no hit            | no hit             |
| PSME1              | -0.8286533 | -1.0987392 | 0.1701342 | 0.0742297 | no hit            | no hit             |
| EIF5B              | -0.9652211 | -1.4702232 | 0.1713992 | 0.0435545 | no hit            | no hit             |
| DSTN               | 0.4122759  | 0.4583294  | 0.1724723 | 0.1316024 | no hit            | no hit             |
| ATP5B              | 0.6481431  | 0.9215067  | 0.1725493 | 0.0584757 | no hit            | enriched candidate |
| TXNL1              | -0.5509991 | -0.8439840 | 0.1734693 | 0.0434590 | no hit            | no hit             |
| PRDX2              | -0.7865315 | -1.1430588 | 0.1757150 | 0.0552915 | no hit            | no hit             |



| gene_name | logFC_PA   | logFC_PE   | pvalue_PA | pvalue_PE | hit_annotation_PA | hit_annotation_PE  |
|-----------|------------|------------|-----------|-----------|-------------------|--------------------|
| HSPA13    | 0.4182579  | 0.6785729  | 0.1760926 | 0.0345871 | no hit            | enriched candidate |
| SERPINH1  | 0.9489722  | 1.1811706  | 0.1769333 | 0.0972135 | no hit            | no hit             |
| AHCY      | -0.3680976 | -0.1397386 | 0.1802514 | 0.6032224 | no hit            | no hit             |
| WDR61     | -0.5347530 | -0.8538863 | 0.1806211 | 0.0390773 | no hit            | no hit             |
| DYNC1H1   | -0.9744223 | -1.1785718 | 0.1809552 | 0.1095142 | no hit            | no hit             |
| PHB2      | 1.0352517  | 1.5160953  | 0.1812454 | 0.0565630 | no hit            | enriched candidate |
| CAT       | 0.5579615  | 0.9047239  | 0.1814100 | 0.0367822 | no hit            | enriched candidate |
| EIF3K     | -0.3610334 | -0.8200624 | 0.1814260 | 0.0053934 | no hit            | no hit             |
| PRKAR2A   | -0.2634099 | -0.4239554 | 0.1821578 | 0.0383458 | no hit            | no hit             |
| RPL38     | -1.3763703 | -1.1037475 | 0.1822352 | 0.2805586 | no hit            | no hit             |
| ACSL4     | 0.9251326  | 0.7330185  | 0.1822896 | 0.2862276 | no hit            | no hit             |
| NPR3      | 0.3784486  | 0.4070312  | 0.1824100 | 0.1530885 | no hit            | no hit             |
| HLA-C     | 0.3664717  | 0.1795401  | 0.1843322 | 0.5075474 | no hit            | no hit             |
| LARP4     | -0.8570415 | -1.3631832 | 0.1843746 | 0.0413741 | no hit            | no hit             |
| XPO1      | -0.4884276 | -0.1528032 | 0.1849720 | 0.6715277 | no hit            | no hit             |
| PRMT1     | -0.4148341 | -0.7798299 | 0.1861481 | 0.0186331 | no hit            | no hit             |
| ITGA3     | 0.4757438  | 0.3885013  | 0.1862523 | 0.2765854 | no hit            | no hit             |
| RACGAP1   | 1.2548032  | 1.0570651  | 0.1863014 | 0.2622452 | no hit            | no hit             |
| RPLP1     | -0.6976493 | -0.9099714 | 0.1880194 | 0.0910683 | no hit            | no hit             |
| MYO1B     | 1.0768574  | 1.1413346  | 0.1884016 | 0.1645073 | no hit            | no hit             |
| SLC35B2   | -0.4295009 | -0.2921223 | 0.1891595 | 0.3656743 | no hit            | no hit             |
| HSPA8     | -0.3693488 | -0.2270991 | 0.1905722 | 0.4140493 | no hit            | no hit             |
| PSMA2     | -0.3567348 | -0.2878853 | 0.1908187 | 0.2871562 | no hit            | no hit             |
| AP2A1     | 0.4433187  | 0.2973237  | 0.1915044 | 0.3748292 | no hit            | no hit             |
| TOR1AIP2  | 0.4197331  | 0.3163467  | 0.1921655 | 0.3207269 | no hit            | no hit             |
| ACTN1     | 0.9289429  | 1.1353098  | 0.1938871 | 0.1163550 | no hit            | no hit             |
| PGRMC1    | 0.4523851  | 0.5333885  | 0.1948146 | 0.1297050 | no hit            | no hit             |
| ACTN4     | 1.2041321  | 1.3633746  | 0.1955819 | 0.1453544 | no hit            | no hit             |
| PABPC4    | -0.6944954 | -1.1678814 | 0.1959278 | 0.0364560 | no hit            | no hit             |
| G3BP1     | -0.9409152 | -1.5250690 | 0.1964417 | 0.0431590 | no hit            | no hit             |
| ADRM1     | -0.5774512 | -0.7601194 | 0.1966368 | 0.0944389 | no hit            | no hit             |
| P4HA1     | 0.4905861  | 0.7315302  | 0.1977732 | 0.0614149 | no hit            | enriched candidate |
| CMPK1     | -0.5004241 | -0.7324657 | 0.1978787 | 0.0659533 | no hit            | no hit             |
| HPRT1     | -0.6949907 | -0.5934223 | 0.1993951 | 0.2702627 | no hit            | no hit             |
| GRB2      | -0.5558618 | -0.6632522 | 0.2007440 | 0.1304002 | no hit            | no hit             |
| SLC6A9    | 0.3530572  | 0.0430949  | 0.2012579 | 0.8732198 | no hit            | no hit             |
| NASP      | -0.5373574 | -0.8833073 | 0.2024011 | 0.0431240 | no hit            | no hit             |
| ECHS1     | 0.7161459  | 1.2456994  | 0.2028539 | 0.0336037 | no hit            | enriched candidate |
| FDFT1     | 0.5369991  | 0.9065920  | 0.2040962 | 0.0390194 | no hit            | enriched candidate |
| CRELD1    | 0.3407067  | 0.1745879  | 0.2045007 | 0.5085792 | no hit            | no hit             |
| PTPRF     | 0.7766446  | 0.8001789  | 0.2048545 | 0.1920595 | no hit            | no hit             |
| SLC2A1    | 0.3761336  | 0.2777946  | 0.2057072 | 0.3451433 | no hit            | no hit             |
| EIF4A3    | -0.7338368 | -0.9888043 | 0.2057364 | 0.0937620 | no hit            | no hit             |
| MYO1C     | 1.2340096  | 1.3361376  | 0.2060303 | 0.1725278 | no hit            | no hit             |
| MGST1     | 0.6989488  | 0.9786733  | 0.2068239 | 0.0832118 | no hit            | no hit             |
| TXLNG     | -0.8441387 | -1.4115810 | 0.2068484 | 0.0418560 | no hit            | no hit             |
| GORASP2   | -0.5605087 | 0.0462007  | 0.2071039 | 0.9153207 | no hit            | no hit             |
| SEPT7     | -1.2334307 | -1.5199100 | 0.2071909 | 0.1242262 | no hit            | no hit             |
| ASPH      | 0.9251205  | 1.2596332  | 0.2073504 | 0.0917313 | no hit            | no hit             |
| GDPD3     | 0.3772271  | 0.3725936  | 0.2077590 | 0.2131561 | no hit            | no hit             |
| SNTB2     | 0.5476806  | 0.7260393  | 0.2080427 | 0.1004546 | no hit            | no hit             |
| HPCAL1    | -0.5952747 | -0.6338699 | 0.2081707 | 0.1814264 | no hit            | no hit             |

| gene_name | logFC_PA   | logFC_PE   | pvalue_PA | pvalue_PE | hit_annotation_PA | hit_annotation_PE  |
|-----------|------------|------------|-----------|-----------|-------------------|--------------------|
| CLPTM1    | 0.4093705  | 0.6133579  | 0.2088599 | 0.0664599 | no hit            | enriched candidate |
| SEPT2     | -0.8926841 | -1.0904602 | 0.2095095 | 0.1292285 | no hit            | no hit             |
| DNAJB11   | 0.9098420  | 0.9897602  | 0.2109674 | 0.1752513 | no hit            | no hit             |
| TMEM259   | 0.4572342  | 0.5374831  | 0.2135374 | 0.1468733 | no hit            | no hit             |
| CD276     | 0.3194928  | 0.2672407  | 0.2136433 | 0.2951536 | no hit            | no hit             |
| ITGA1     | 0.7363086  | 0.7095578  | 0.2178101 | 0.2342999 | no hit            | no hit             |
| CKAP4     | 1.0374425  | 1.3524718  | 0.2187040 | 0.1138606 | no hit            | no hit             |
| ALDOA     | -0.4578697 | -0.6252609 | 0.2198786 | 0.0996045 | no hit            | no hit             |
| VASN      | 0.3945106  | 0.2133211  | 0.2206697 | 0.5015023 | no hit            | no hit             |
| TXLNA     | -0.7825708 | -1.3905142 | 0.2223436 | 0.0373870 | no hit            | no hit             |
| LGALS3    | 0.3152423  | 0.2921546  | 0.2228815 | 0.2572663 | no hit            | no hit             |
| ECI2      | 0.7559716  | 1.1563790  | 0.2230628 | 0.0693628 | no hit            | enriched candidate |
| AUP1      | 0.7653565  | 0.9183123  | 0.2247176 | 0.1487121 | no hit            | no hit             |
| KIF23     | 1.3762028  | 1.1455282  | 0.2249349 | 0.3094339 | no hit            | no hit             |
| DDX39B    | -0.4483316 | -0.0884175 | 0.2278352 | 0.8083495 | no hit            | no hit             |
| ARPC2     | 0.8387718  | 0.9420930  | 0.2294064 | 0.1792502 | no hit            | no hit             |
| PSMB4     | -0.4262704 | -0.3543919 | 0.2300335 | 0.3153738 | no hit            | no hit             |
| FKBP10    | 0.4576698  | 0.6133966  | 0.2301868 | 0.1132303 | no hit            | no hit             |
| MBOAT7    | 0.5866982  | 0.9957172  | 0.2301932 | 0.0492205 | no hit            | enriched candidate |
| CLPP      | 0.4817375  | 0.7479977  | 0.2305996 | 0.0698576 | no hit            | enriched candidate |
| LIMA1     | 0.7611764  | 0.9203629  | 0.2311615 | 0.1512981 | no hit            | no hit             |
| PODXL2    | 0.3814965  | 0.3655090  | 0.2315324 | 0.2509176 | no hit            | no hit             |
| TKT       | -0.3688553 | -0.4913761 | 0.2315713 | 0.1163288 | no hit            | no hit             |
| DDX6      | -0.8606561 | -1.1429265 | 0.2327959 | 0.1183436 | no hit            | no hit             |
| HMGGB1    | -0.7689009 | -1.0217888 | 0.2341188 | 0.1191183 | no hit            | no hit             |
| ATP2A2    | 0.5280694  | 0.9832882  | 0.2350848 | 0.0343790 | no hit            | enriched candidate |
| RSU1      | -0.5293020 | -0.4237555 | 0.2352318 | 0.3385930 | no hit            | no hit             |
| S100A16   | -0.3952593 | -0.8653984 | 0.2363937 | 0.0151367 | no hit            | no hit             |
| CCDC47    | 0.9389928  | 1.2682447  | 0.2368414 | 0.1156282 | no hit            | no hit             |
| HADHA     | 0.4662461  | 0.9638485  | 0.2393573 | 0.0214936 | no hit            | enriched candidate |
| MTHFD1    | -0.9865059 | -1.2043627 | 0.2396704 | 0.1548941 | no hit            | no hit             |
| PSMA7     | -0.2666472 | -0.0195521 | 0.2407575 | 0.9301211 | no hit            | no hit             |
| ITGB1     | 0.6028352  | 0.6285449  | 0.2430567 | 0.2242890 | no hit            | no hit             |
| CAP1      | -0.4675020 | -0.3160625 | 0.2434228 | 0.4256011 | no hit            | no hit             |
| ATP6AP2   | 0.4593696  | 0.4762395  | 0.2458170 | 0.2295416 | no hit            | no hit             |
| NRAS      | -0.3555890 | -0.6062246 | 0.2459363 | 0.0556734 | no hit            | no hit             |
| ABCF2     | -0.8384770 | -1.2729247 | 0.2464148 | 0.0855027 | no hit            | no hit             |
| SLC22A18  | 0.4999536  | 0.6506782  | 0.2465142 | 0.1363421 | no hit            | no hit             |
| MYO1E     | 1.0374950  | 1.0311746  | 0.2482288 | 0.2510173 | no hit            | no hit             |
| PGRMC2    | 0.5230338  | 0.4461151  | 0.2494738 | 0.3235609 | no hit            | no hit             |
| CD109     | 0.5226382  | 0.2843424  | 0.2494741 | 0.5255844 | no hit            | no hit             |
| PABPC1    | -0.7657607 | -1.2853266 | 0.2502205 | 0.0613787 | no hit            | no hit             |
| COMT      | 0.3793053  | 0.5558602  | 0.2502978 | 0.0986723 | no hit            | no hit             |
| SACM1L    | 0.6798284  | 0.8889034  | 0.2504870 | 0.1378444 | no hit            | no hit             |
| GARS      | -0.5564182 | -0.6178410 | 0.2531211 | 0.2063277 | no hit            | no hit             |
| REEP6     | -0.3948524 | -0.5485894 | 0.2555428 | 0.1200405 | no hit            | no hit             |
| CSPG4     | 0.3372564  | 0.2071553  | 0.2574308 | 0.4818129 | no hit            | no hit             |
| RPL18A    | -0.8012599 | -1.0647002 | 0.2577255 | 0.1377294 | no hit            | no hit             |
| WLS       | 0.3405494  | 0.6001163  | 0.2585101 | 0.0544451 | no hit            | enriched candidate |
| HNRNPA1   | -0.7122415 | -0.0891362 | 0.2596919 | 0.8858464 | no hit            | no hit             |
| CXADR     | 0.3314016  | 0.1803730  | 0.2596961 | 0.5344966 | no hit            | no hit             |
| TMX3      | 0.3871463  | 0.4835278  | 0.2613083 | 0.1646260 | no hit            | no hit             |

| gene_name     | logFC_PA   | logFC_PE   | pvalue_PA | pvalue_PE | hit_annotation_PA | hit_annotation_PE  |
|---------------|------------|------------|-----------|-----------|-------------------|--------------------|
| SCAMP1        | -0.3356148 | -0.5459533 | 0.2623313 | 0.0759383 | no hit            | no hit             |
| EIF1AY EIF1AX | -0.9107681 | -1.1709613 | 0.2623737 | 0.1540957 | no hit            | no hit             |
| TAP1          | 0.5026019  | 1.0862074  | 0.2644086 | 0.0226909 | no hit            | enriched candidate |
| RBMX          | -0.6463810 | 0.0391064  | 0.2654104 | 0.9453388 | no hit            | no hit             |
| CLTC          | -0.6017355 | -0.9168297 | 0.2672966 | 0.0980671 | no hit            | no hit             |
| TM9SF4        | -0.3620671 | -0.3815750 | 0.2680679 | 0.2440042 | no hit            | no hit             |
| FXR1          | -0.8131010 | -1.0024651 | 0.2688156 | 0.1764772 | no hit            | no hit             |
| ERH           | -0.5510695 | -0.0124216 | 0.2701238 | 0.9798265 | no hit            | no hit             |
| ANXA4         | -0.3897706 | -1.0457973 | 0.2713977 | 0.0069116 | no hit            | no hit             |
| VAMP3         | -0.3572429 | -0.5252880 | 0.2717534 | 0.1126949 | no hit            | no hit             |
| LDLR          | -0.3726042 | -0.4455738 | 0.2733777 | 0.1933577 | no hit            | no hit             |
| SEPT10        | -0.8078085 | -1.0533540 | 0.2742079 | 0.1585877 | no hit            | no hit             |
| PODXL         | 0.4364640  | 0.4962518  | 0.2764118 | 0.2180638 | no hit            | no hit             |
| CFL1          | 0.3755804  | 0.6947909  | 0.2771756 | 0.0526751 | no hit            | enriched candidate |
| GEMIN5        | -0.9234248 | -1.1881832 | 0.2773421 | 0.1665755 | no hit            | no hit             |
| CNPY2 F8W031  | 0.6198838  | 0.6623748  | 0.2774079 | 0.2468770 | no hit            | no hit             |
| VIM           | -0.7550759 | 0.2748573  | 0.2776430 | 0.6885019 | no hit            | no hit             |
| RPS25         | -1.0555336 | -1.4913347 | 0.2778374 | 0.1311902 | no hit            | no hit             |
| SLC44A1       | 0.5331593  | 0.3191940  | 0.2799447 | 0.5133502 | no hit            | no hit             |
| TM9SF3        | -0.4410135 | -0.2820623 | 0.2804642 | 0.4858499 | no hit            | no hit             |
| VDAC1         | 0.4891815  | 0.6999095  | 0.2832936 | 0.1308736 | no hit            | no hit             |
| METAP2        | -1.1672268 | -1.7239209 | 0.2838974 | 0.1200882 | no hit            | no hit             |
| AP2M1         | 0.6692516  | 0.4596463  | 0.2839912 | 0.4580464 | no hit            | no hit             |
| NCEH1         | 0.3895530  | 0.4323896  | 0.2842689 | 0.2363231 | no hit            | no hit             |
| GPRC5A        | 0.5835683  | 0.7300156  | 0.2844384 | 0.1843865 | no hit            | no hit             |
| SCAMP2        | -0.3611587 | -0.7141227 | 0.2845094 | 0.0425531 | no hit            | no hit             |
| APMAP         | 0.4756683  | 0.4846636  | 0.2868441 | 0.2781128 | no hit            | no hit             |
| GPD2          | 0.7016824  | 1.3088019  | 0.2878149 | 0.0558469 | no hit            | enriched candidate |
| RPS7          | -0.8317582 | -1.1847248 | 0.2886797 | 0.1367301 | no hit            | no hit             |
| PSMB1         | -0.3880081 | -0.1190548 | 0.2891161 | 0.7414412 | no hit            | no hit             |
| SLC16A1       | 0.2446925  | 0.1246826  | 0.2914283 | 0.5865823 | no hit            | no hit             |
| P4HB          | 0.5295123  | 0.5141162  | 0.2925002 | 0.3063375 | no hit            | no hit             |
| ANXA2         | 0.2289044  | 0.0315289  | 0.2959714 | 0.8838129 | no hit            | no hit             |
| FARSB         | -0.6211158 | -0.9754518 | 0.2960562 | 0.1081376 | no hit            | no hit             |
| RAB27B        | 0.3835296  | 0.2493259  | 0.2963088 | 0.4934005 | no hit            | no hit             |
| VAPA          | 0.5013389  | 0.9139444  | 0.2965477 | 0.0655578 | no hit            | enriched candidate |
| RAB1B         | -0.3824102 | -0.4802344 | 0.2980556 | 0.1950401 | no hit            | no hit             |
| SEPT9         | -0.9908514 | -1.1495393 | 0.2982647 | 0.2298990 | no hit            | no hit             |
| DEGS1         | 0.3264638  | 0.5725459  | 0.3008159 | 0.0779586 | no hit            | no hit             |
| DLG1          | 0.2685080  | 0.4981249  | 0.3014211 | 0.0638309 | no hit            | no hit             |
| ZMPSTE24      | 0.4647001  | 0.7210685  | 0.3040662 | 0.1179194 | no hit            | no hit             |
| RABAC1        | -0.4214853 | -0.4863726 | 0.3040845 | 0.2378858 | no hit            | no hit             |
| CSDE1         | -0.8677602 | -1.3081679 | 0.3051104 | 0.1288399 | no hit            | no hit             |
| SCD           | 0.4187249  | 0.8347019  | 0.3058105 | 0.0498486 | no hit            | enriched candidate |
| SLC5A6        | -0.2534202 | -0.5117102 | 0.3077571 | 0.0480789 | no hit            | no hit             |
| HDGF          | -0.3794429 | -0.7799302 | 0.3080303 | 0.0447058 | no hit            | no hit             |
| FAU           | -1.2183756 | -1.5092772 | 0.3086996 | 0.2107272 | no hit            | no hit             |
| S100A13       | -0.5376245 | -0.9305155 | 0.3089895 | 0.0865794 | no hit            | no hit             |
| RPL5          | -0.6903833 | -1.1747547 | 0.3097510 | 0.0920863 | no hit            | no hit             |
| PLD3          | 0.2875705  | 0.3640653  | 0.3098410 | 0.2023372 | no hit            | no hit             |
| TPM4          | 0.4376922  | 0.5770425  | 0.3109776 | 0.1861186 | no hit            | no hit             |
| RPS14         | -0.7317541 | -1.1634865 | 0.3128199 | 0.1159482 | no hit            | no hit             |

| gene_name             | logFC_PA   | logFC_PE   | pvalue_PA | pvalue_PE | hit_annotation_PA | hit_annotation_PE  |
|-----------------------|------------|------------|-----------|-----------|-------------------|--------------------|
| STT3B                 | 1.2871175  | 1.3664882  | 0.3142492 | 0.2861883 | no hit            | no hit             |
| FUBP1                 | -0.3619687 | -0.6758808 | 0.3153676 | 0.0695858 | no hit            | no hit             |
| SFPQ                  | -0.5062834 | -0.0471734 | 0.3154967 | 0.9244352 | no hit            | no hit             |
| ESYT1                 | 0.6876612  | 0.9129691  | 0.3183955 | 0.1898051 | no hit            | no hit             |
| M6PR                  | -0.5028284 | -0.6549505 | 0.3205010 | 0.1998450 | no hit            | no hit             |
| FLVCR1                | 0.3130558  | 0.0821283  | 0.3209768 | 0.7919818 | no hit            | no hit             |
| RUVBL2                | -0.5663251 | -0.7702881 | 0.3221846 | 0.1830327 | no hit            | no hit             |
| CORO1C                | 0.5854411  | 0.6345545  | 0.3242751 | 0.2864592 | no hit            | no hit             |
| RPL14                 | -1.0125213 | -1.3067001 | 0.3250588 | 0.2080305 | no hit            | no hit             |
| TMEM165               | -0.4216952 | -0.4595446 | 0.3262406 | 0.2858887 | no hit            | no hit             |
| NCL                   | 0.3709587  | 0.7250099  | 0.3266669 | 0.0642066 | no hit            | enriched candidate |
| IKBIP                 | 0.7831438  | 1.1417357  | 0.3269566 | 0.1589767 | no hit            | no hit             |
| EIF2A                 | -0.6542443 | -1.0084641 | 0.3272351 | 0.1378801 | no hit            | no hit             |
| SEC61B                | 0.3143726  | 0.2599649  | 0.3276498 | 0.4163027 | no hit            | no hit             |
| PSMA3                 | -0.4040460 | -0.5553528 | 0.3279420 | 0.1837614 | no hit            | no hit             |
| CYB5R3                | 0.4456785  | 0.7990912  | 0.3290754 | 0.0887368 | no hit            | no hit             |
| AK2                   | 0.5170853  | 0.9504375  | 0.3293545 | 0.0817618 | no hit            | no hit             |
| RPL24                 | -0.9191877 | -1.3019531 | 0.3362564 | 0.1786114 | no hit            | no hit             |
| RPL36A RPL36A-HNRNPH2 | -0.8823112 | -1.3371821 | 0.3364819 | 0.1517261 | no hit            | no hit             |
| ARPC4-TTL3 ARPC4      | 0.3463547  | 0.4158419  | 0.3367566 | 0.2514127 | no hit            | no hit             |
| DDX3X                 | -0.7297179 | -1.0153922 | 0.3378197 | 0.1873957 | no hit            | no hit             |
| HLA-A                 | 0.2389993  | 0.0103419  | 0.3387667 | 0.9665554 | no hit            | no hit             |
| TMX2                  | 0.3317400  | 0.9467155  | 0.3411925 | 0.0120021 | no hit            | enriched candidate |
| STX10                 | -0.3488578 | -0.4856360 | 0.3420549 | 0.1910114 | no hit            | no hit             |
| CALR                  | 0.3275359  | 0.5172317  | 0.3420856 | 0.1406136 | no hit            | no hit             |
| PPP3CA                | -0.2388980 | -0.3992380 | 0.3423152 | 0.1203675 | no hit            | no hit             |
| EIF3G                 | -0.8235661 | -1.2972172 | 0.3423820 | 0.1418085 | no hit            | no hit             |
| RPLP0                 | -0.6730905 | -1.0651957 | 0.3433146 | 0.1407894 | no hit            | no hit             |
| SLC7A2                | -0.2848604 | -0.3995457 | 0.3448875 | 0.1903705 | no hit            | no hit             |
| SLC31A1               | 0.2908689  | -0.0560104 | 0.3458152 | 0.8542247 | no hit            | no hit             |
| RPS8                  | -0.8715098 | -1.1752908 | 0.3461180 | 0.2083535 | no hit            | no hit             |
| TMED5                 | -0.4449062 | -0.1431350 | 0.3470317 | 0.7596693 | no hit            | no hit             |
| RPL35                 | -0.9043925 | -1.1620853 | 0.3480880 | 0.2315781 | no hit            | no hit             |
| SCP2                  | 0.5047331  | 1.0237617  | 0.3484288 | 0.0664381 | no hit            | enriched candidate |
| E9PAM4 PI4K2A         | -0.3162002 | -0.4878897 | 0.3495461 | 0.1555436 | no hit            | no hit             |
| RPL11                 | -0.8546576 | -1.1890316 | 0.3500932 | 0.1985455 | no hit            | no hit             |
| RPL15                 | -0.7978020 | -0.9475853 | 0.3502915 | 0.2696080 | no hit            | no hit             |
| TSPAN4                | 0.6361595  | 0.2973885  | 0.3508632 | 0.6597311 | no hit            | no hit             |
| RPS20                 | -0.8739130 | -1.3810225 | 0.3543163 | 0.1502141 | no hit            | no hit             |
| TECR                  | 0.7546452  | 0.8234753  | 0.3547755 | 0.3136913 | no hit            | no hit             |
| NAPA                  | -0.2622515 | -0.3380945 | 0.3551982 | 0.2368901 | no hit            | no hit             |
| KDSR                  | 0.3551705  | 0.4978699  | 0.3584189 | 0.2029220 | no hit            | no hit             |
| ITGA2                 | 0.5012052  | 0.2802604  | 0.3592761 | 0.6053160 | no hit            | no hit             |
| XRCC5                 | -0.5917313 | -0.7128302 | 0.3605306 | 0.2731589 | no hit            | no hit             |
| SYNCRIP               | -0.5910552 | -0.8579058 | 0.3608183 | 0.1902191 | no hit            | no hit             |
| SURF4                 | -0.2996728 | -0.2397919 | 0.3612315 | 0.4631764 | no hit            | no hit             |
| SYPL1                 | -0.5468150 | -0.3614096 | 0.3617302 | 0.5440042 | no hit            | no hit             |
| FKBP9                 | 0.3855950  | 0.3653033  | 0.3620501 | 0.3873045 | no hit            | no hit             |
| RPL7                  | -0.8038363 | -1.2803383 | 0.3623667 | 0.1537990 | no hit            | no hit             |
| MICA                  | 0.3456726  | 0.3609124  | 0.3624216 | 0.3421447 | no hit            | no hit             |
| RPL36                 | -0.9026262 | -1.1684220 | 0.3626459 | 0.2422200 | no hit            | no hit             |
| RPS3A                 | -0.7393476 | -1.0960594 | 0.3650739 | 0.1851519 | no hit            | no hit             |

| gene_name | logFC_PA   | logFC_PE   | pvalue_PA | pvalue_PE | hit_annotation_PA | hit_annotation_PE  |
|-----------|------------|------------|-----------|-----------|-------------------|--------------------|
| CY5B      | 0.5613273  | 0.6710972  | 0.3671943 | 0.2832957 | no hit            | no hit             |
| RHEB      | 0.2058517  | 0.2394298  | 0.3682448 | 0.2972043 | no hit            | no hit             |
| SEC61A1   | 0.2966841  | 0.6914496  | 0.3688266 | 0.0454093 | no hit            | enriched candidate |
| PDIA4     | 0.6446313  | 0.8142042  | 0.3688550 | 0.2594935 | no hit            | no hit             |
| P4HA2     | 0.4168585  | 0.5944729  | 0.3718328 | 0.2078787 | no hit            | no hit             |
| PSMA4     | -0.2404741 | -0.0015543 | 0.3721474 | 0.9953458 | no hit            | no hit             |
| UQCRB     | 0.7334598  | 1.1612093  | 0.3729699 | 0.1651250 | no hit            | no hit             |
| RPL23A    | -0.7721570 | -1.0143976 | 0.3731138 | 0.2456676 | no hit            | no hit             |
| RPS17     | -0.8838204 | -1.4228098 | 0.3731412 | 0.1586376 | no hit            | no hit             |
| RPS3      | -0.7743381 | -1.1823833 | 0.3734615 | 0.1802986 | no hit            | no hit             |
| PLEC      | -0.5750348 | 0.1088815  | 0.3758303 | 0.8654216 | no hit            | no hit             |
| LGALS3BP  | 0.2572816  | 0.5519703  | 0.3772971 | 0.0677993 | no hit            | no hit             |
| EEF2      | -0.6237502 | -0.9191843 | 0.3809253 | 0.2021019 | no hit            | no hit             |
| RAB1A     | -0.2464567 | -0.3929116 | 0.3811400 | 0.1693721 | no hit            | no hit             |
| RPS11     | -0.7354220 | -1.2214507 | 0.3814275 | 0.1533688 | no hit            | no hit             |
| RPS2      | -0.8145821 | -1.2056922 | 0.3816428 | 0.2008708 | no hit            | no hit             |
| TMEM33    | 0.2773073  | 0.7626371  | 0.3817426 | 0.0238227 | no hit            | enriched candidate |
| RPL13     | -0.8333597 | -1.1379202 | 0.3820103 | 0.2368046 | no hit            | no hit             |
| RPL22     | -0.7907898 | -1.3428734 | 0.3822431 | 0.1455192 | no hit            | no hit             |
| CLCC1     | 0.3326902  | 0.6428979  | 0.3825695 | 0.1006723 | no hit            | no hit             |
| RPS9      | -0.8120057 | -1.3552671 | 0.3860102 | 0.1552954 | no hit            | no hit             |
| RPS24     | -0.8573689 | -1.2758859 | 0.3870024 | 0.2035100 | no hit            | no hit             |
| RPL34     | -0.9369821 | -1.1988690 | 0.3878728 | 0.2723436 | no hit            | no hit             |
| EIF3F     | -0.3842297 | -0.8356300 | 0.3878973 | 0.0701140 | no hit            | no hit             |
| MATR3     | -0.3896702 | -0.3518068 | 0.3880900 | 0.4349733 | no hit            | no hit             |
| NIT2      | -0.2491599 | -0.1309036 | 0.3897615 | 0.6489310 | no hit            | no hit             |
| S100A10   | 0.2886700  | 0.2487605  | 0.3912761 | 0.4588628 | no hit            | no hit             |
| HTATIP2   | 0.4882925  | 0.4114694  | 0.3912981 | 0.4687401 | no hit            | no hit             |
| FAM3C     | -0.2530116 | -0.3495352 | 0.3918667 | 0.2411073 | no hit            | no hit             |
| LRRC59    | 1.0666575  | 1.7379222  | 0.3938065 | 0.1715984 | no hit            | no hit             |
| REEP5     | -0.3843386 | -0.3321109 | 0.3954758 | 0.4616551 | no hit            | no hit             |
| RPL28     | -0.7495031 | -1.0767428 | 0.3972160 | 0.2287000 | no hit            | no hit             |
| RPL7A     | -0.7597630 | -1.0601064 | 0.3974695 | 0.2420791 | no hit            | no hit             |
| RPL26     | -0.8335416 | -1.2629444 | 0.3979554 | 0.2059466 | no hit            | no hit             |
| RPL29     | -0.9636526 | -1.1746680 | 0.3982230 | 0.3054071 | no hit            | no hit             |
| IGF2BP3   | -0.6259536 | -0.9819136 | 0.3999283 | 0.1928785 | no hit            | no hit             |
| TXNDC12   | 0.3124914  | 0.5234791  | 0.4003237 | 0.1660708 | no hit            | no hit             |
| AP2B1     | 0.2743329  | 0.2643168  | 0.4018140 | 0.4188954 | no hit            | no hit             |
| RPS13     | -0.7244270 | -1.2016797 | 0.4021990 | 0.1716846 | no hit            | no hit             |
| CDC42     | 0.2414787  | 0.0214432  | 0.4050529 | 0.9404895 | no hit            | no hit             |
| SLC2A3    | 0.3829006  | 0.2428679  | 0.4054841 | 0.5956313 | no hit            | no hit             |
| DARS      | 0.4621965  | 0.3120175  | 0.4060339 | 0.5728485 | no hit            | no hit             |
| MPZL1     | 0.3868072  | 0.3173118  | 0.4065007 | 0.4945634 | no hit            | no hit             |
| GLG1      | -0.2772624 | -0.1132116 | 0.4072998 | 0.7330449 | no hit            | no hit             |
| RPL13A    | -0.7918771 | -1.1281656 | 0.4074574 | 0.2424523 | no hit            | no hit             |
| HDLBP     | -0.5052360 | -0.8107209 | 0.4094137 | 0.1919928 | no hit            | no hit             |
| RPL19     | -0.6723126 | -1.1177523 | 0.4099860 | 0.1776871 | no hit            | no hit             |
| RPL8      | -0.9069136 | -1.3424516 | 0.4102002 | 0.2279142 | no hit            | no hit             |
| HM13      | 0.3749500  | 0.5093270  | 0.4111289 | 0.2679455 | no hit            | no hit             |
| CPNE3     | -0.2338397 | -0.3214158 | 0.4113480 | 0.2627167 | no hit            | no hit             |
| RPS18     | -0.6707669 | -1.1811845 | 0.4127722 | 0.1569838 | no hit            | no hit             |
| VKORC1L1  | 0.3571129  | 0.3562727  | 0.4136751 | 0.4147544 | no hit            | no hit             |

| gene_name            | logFC_PA   | logFC_PE   | pvalue_PA | pvalue_PE | hit_annotation_PA | hit_annotation_PE |
|----------------------|------------|------------|-----------|-----------|-------------------|-------------------|
| RPL10A               | -0.7421003 | -1.0748685 | 0.4145078 | 0.2419216 | no hit            | no hit            |
| SCARB1               | 0.2631376  | 0.2606525  | 0.4145667 | 0.4189073 | no hit            | no hit            |
| SCRIB                | 0.2345346  | 0.2165163  | 0.4172461 | 0.4533172 | no hit            | no hit            |
| RPL21                | -0.7406006 | -1.0599002 | 0.4179388 | 0.2507942 | no hit            | no hit            |
| FLNB                 | 0.3995931  | 0.6712528  | 0.4183074 | 0.1809192 | no hit            | no hit            |
| RPLP2                | -0.5543999 | -1.1430867 | 0.4185280 | 0.1048435 | no hit            | no hit            |
| RCC2                 | -0.6522001 | -0.9090149 | 0.4198138 | 0.2648305 | no hit            | no hit            |
| FLNA                 | 0.7026479  | 0.8370706  | 0.4200562 | 0.3385726 | no hit            | no hit            |
| RPL27                | -0.7488666 | -0.9817767 | 0.4204064 | 0.2939087 | no hit            | no hit            |
| ENG                  | 0.2534421  | 0.2120423  | 0.4205430 | 0.4992127 | no hit            | no hit            |
| RANGAP1              | 0.2681333  | 0.1640025  | 0.4209500 | 0.6205792 | no hit            | no hit            |
| RPL17 RPL17-C18orf32 | -0.7280410 | -0.9930729 | 0.4211520 | 0.2761759 | no hit            | no hit            |
| RPS4X                | -0.6505533 | -0.9780111 | 0.4211750 | 0.2317113 | no hit            | no hit            |
| SQSTM1               | 0.5265306  | 0.5998086  | 0.4211832 | 0.3607753 | no hit            | no hit            |
| RPS6                 | -0.7129250 | -1.1310338 | 0.4213852 | 0.2081219 | no hit            | no hit            |
| CD151                | 0.3682590  | 0.1048861  | 0.4234917 | 0.8182084 | no hit            | no hit            |
| RPL3                 | -0.6693002 | -0.9505590 | 0.4244043 | 0.2608037 | no hit            | no hit            |
| GAA                  | -0.2220331 | -0.0226581 | 0.4247618 | 0.9345054 | no hit            | no hit            |
| STX7                 | -0.2426743 | -0.3327488 | 0.4253528 | 0.2780365 | no hit            | no hit            |
| VAPB                 | 0.2270465  | 0.4803762  | 0.4278509 | 0.1031251 | no hit            | no hit            |
| RPS23                | -0.6949735 | -1.2703006 | 0.4285290 | 0.1559076 | no hit            | no hit            |
| TBL2                 | 0.6729672  | 1.0830149  | 0.4288388 | 0.2090324 | no hit            | no hit            |
| PSMB6                | -0.3647889 | -0.5897653 | 0.4317972 | 0.2098741 | no hit            | no hit            |
| RPL4                 | -0.7205831 | -1.0077362 | 0.4330908 | 0.2767951 | no hit            | no hit            |
| ATP6AP1              | 0.3615237  | 0.4814670  | 0.4346768 | 0.3012787 | no hit            | no hit            |
| GOLPH3               | -0.2477797 | -0.2444842 | 0.4351813 | 0.4412116 | no hit            | no hit            |
| RPS5                 | -0.6805561 | -1.0576074 | 0.4360541 | 0.2315500 | no hit            | no hit            |
| ACLY                 | -0.5805583 | -0.7639730 | 0.4379443 | 0.3103029 | no hit            | no hit            |
| VAT1                 | -0.2925052 | -0.3899011 | 0.4435068 | 0.3100714 | no hit            | no hit            |
| DPM3                 | 0.3892319  | 0.5039774  | 0.4447278 | 0.3250270 | no hit            | no hit            |
| HNRNPL               | -0.4353905 | -0.1985422 | 0.4456955 | 0.7263335 | no hit            | no hit            |
| ARF3 ARF1            | -0.2104515 | -0.2488867 | 0.4511670 | 0.3743768 | no hit            | no hit            |
| RPL23                | -0.7737745 | -1.2370109 | 0.4528072 | 0.2356275 | no hit            | no hit            |
| RPS16                | -0.6640048 | -1.1339480 | 0.4546834 | 0.2082472 | no hit            | no hit            |
| RPS27A               | -0.6527722 | -1.1415464 | 0.4574746 | 0.2006963 | no hit            | no hit            |
| RPL30                | -0.6703706 | -1.0763097 | 0.4574993 | 0.2384601 | no hit            | no hit            |
| RPS19                | -0.6157550 | -1.3013651 | 0.4576796 | 0.1259548 | no hit            | no hit            |
| TMED10               | -0.3098274 | -0.4499838 | 0.4577882 | 0.2848884 | no hit            | no hit            |
| CYFIP1               | 0.6069145  | 0.6194631  | 0.4592128 | 0.4501244 | no hit            | no hit            |
| RHOB                 | 0.2059062  | 0.0250409  | 0.4599029 | 0.9278470 | no hit            | no hit            |
| RPL6                 | -0.6616957 | -1.0933862 | 0.4600713 | 0.2281481 | no hit            | no hit            |
| RPL27A               | -0.6422145 | -1.0844665 | 0.4613297 | 0.2197720 | no hit            | no hit            |
| HNRNPK               | -0.3659242 | -0.6599319 | 0.4638106 | 0.1936588 | no hit            | no hit            |
| RPL10                | -0.7253314 | -1.1898856 | 0.4657692 | 0.2372063 | no hit            | no hit            |
| EIF2S3               | -0.5852716 | -1.0671759 | 0.4664822 | 0.1915754 | no hit            | no hit            |
| CASC4                | -0.2819521 | -0.4943941 | 0.4665198 | 0.2084111 | no hit            | no hit            |
| MARS                 | 0.2854450  | 0.3787247  | 0.4684803 | 0.3387717 | no hit            | no hit            |
| RTN3                 | -0.3459618 | -0.3808997 | 0.4692280 | 0.4262640 | no hit            | no hit            |
| TNFRSF10A            | 0.1756454  | -0.1066146 | 0.4695083 | 0.6591751 | no hit            | no hit            |
| RPL35A               | -0.7198064 | -1.0699368 | 0.4697412 | 0.2867419 | no hit            | no hit            |
| RPS15A               | -0.5864656 | -0.8310171 | 0.4719482 | 0.3115354 | no hit            | no hit            |
| RPS26                | -0.7209519 | -1.3299764 | 0.4730815 | 0.1930296 | no hit            | no hit            |

| gene_name                 | logFC_PA   | logFC_PE   | pvalue_PA | pvalue_PE | hit_annotation_PA | hit_annotation_PE |
|---------------------------|------------|------------|-----------|-----------|-------------------|-------------------|
| XRCC6                     | -0.4768411 | -0.6544365 | 0.4740420 | 0.3288321 | no hit            | no hit            |
| RTN4                      | -0.3502438 | -0.9253006 | 0.4781009 | 0.0715115 | no hit            | no hit            |
| PSMA1                     | -0.1557183 | -0.2073236 | 0.4801690 | 0.3497639 | no hit            | no hit            |
| PSEN1                     | 0.2247999  | 0.0490752  | 0.4807261 | 0.8768522 | no hit            | no hit            |
| HNRNPC                    | -0.5231644 | -0.2451348 | 0.4828231 | 0.7409500 | no hit            | no hit            |
| ITGAV                     | 0.2860721  | 0.2204525  | 0.4832110 | 0.5879407 | no hit            | no hit            |
| SLC29A1                   | 0.3318377  | 0.0671470  | 0.4856465 | 0.8870697 | no hit            | no hit            |
| CLUH                      | -0.3909244 | -1.0259678 | 0.4858443 | 0.0780417 | no hit            | no hit            |
| LAMTOR2                   | -0.3259802 | 0.0370592  | 0.4865540 | 0.9365280 | no hit            | no hit            |
| RPSA                      | -0.3792508 | -1.0851253 | 0.4889121 | 0.0581950 | no hit            | no hit            |
| LPCAT3                    | 0.2804523  | 0.4758574  | 0.4895819 | 0.2467825 | no hit            | no hit            |
| RPL9                      | -0.6884048 | -1.1384194 | 0.4906998 | 0.2597373 | no hit            | no hit            |
| RAB21                     | 0.1589412  | 0.3823176  | 0.4951388 | 0.1110940 | no hit            | no hit            |
| RAB5A                     | 0.1992319  | 0.4798704  | 0.4966859 | 0.1118641 | no hit            | no hit            |
| RPL12                     | -0.5505902 | -0.8483631 | 0.4974307 | 0.2999692 | no hit            | no hit            |
| FERMT2                    | 0.3726710  | 0.2277756  | 0.4990936 | 0.6783076 | no hit            | no hit            |
| PVR                       | 0.3589297  | 0.3156166  | 0.4998772 | 0.5524322 | no hit            | no hit            |
| BAIAP2L1                  | 0.3747394  | 0.1782274  | 0.5004852 | 0.7474485 | no hit            | no hit            |
| UPF1                      | -0.5501691 | -0.8731530 | 0.5025846 | 0.2918223 | no hit            | no hit            |
| ANTXR1                    | 0.1650726  | -0.1052309 | 0.5028140 | 0.6681052 | no hit            | no hit            |
| HRAS                      | 0.2489713  | -0.0020219 | 0.5035072 | 0.9956380 | no hit            | no hit            |
| RPL32                     | -0.6227703 | -0.8883385 | 0.5037478 | 0.3432933 | no hit            | no hit            |
| CCT7                      | 0.5706808  | 0.4732419  | 0.5061346 | 0.5806681 | no hit            | no hit            |
| C14orf166                 | -0.3182618 | -0.7046305 | 0.5064785 | 0.1506105 | no hit            | no hit            |
| LYPLA1                    | -0.2256490 | -0.1602324 | 0.5092508 | 0.6382971 | no hit            | no hit            |
| PCYOX1                    | 0.2782876  | 0.4072001  | 0.5101205 | 0.3384499 | no hit            | no hit            |
| RPL37A                    | -0.6954517 | -1.0447554 | 0.5127835 | 0.3290567 | no hit            | no hit            |
| RAB27A                    | 0.3211234  | 0.4518342  | 0.5132547 | 0.3603960 | no hit            | no hit            |
| BCAP31                    | 0.2063963  | 0.3408285  | 0.5154459 | 0.2876308 | no hit            | no hit            |
| TMED7-TICAM2 TICAM2 TMED7 | -0.3779983 | -0.1717446 | 0.5154567 | 0.7665532 | no hit            | no hit            |
| ELAVL1                    | -0.3535949 | -0.3485923 | 0.5175210 | 0.5233957 | no hit            | no hit            |
| DAGLB                     | -0.2105249 | -0.1672868 | 0.5185555 | 0.6071934 | no hit            | no hit            |
| EIF3A                     | -0.6053218 | -1.0504894 | 0.5249494 | 0.2752273 | no hit            | no hit            |
| DERL2                     | 0.2379586  | 0.4816663  | 0.5267406 | 0.2076798 | no hit            | no hit            |
| SLC38A2                   | -0.2491920 | -0.4364245 | 0.5286826 | 0.2752243 | no hit            | no hit            |
| RPL31                     | -0.6298237 | -1.0987274 | 0.5323827 | 0.2812822 | no hit            | no hit            |
| RPL18                     | -0.6172557 | -0.9497302 | 0.5330238 | 0.3409919 | no hit            | no hit            |
| SLC35F6                   | -0.3537498 | -0.2156407 | 0.5388883 | 0.7070423 | no hit            | no hit            |
| EIF2S1                    | -0.4435920 | -0.9023143 | 0.5423632 | 0.2225104 | no hit            | no hit            |
| VPS35                     | -0.3582235 | -0.3605282 | 0.5447318 | 0.5421733 | no hit            | no hit            |
| SNAP23                    | 0.2137274  | -0.0457802 | 0.5496468 | 0.8975413 | no hit            | no hit            |
| CCT2                      | 0.4682346  | 0.3322103  | 0.5502757 | 0.6709352 | no hit            | no hit            |
| ATP6V0A1                  | 0.1337670  | 0.2310992  | 0.5503550 | 0.3068558 | no hit            | no hit            |
| ATL3                      | 0.1245788  | 0.3934117  | 0.5551268 | 0.0735579 | no hit            | no hit            |
| IGF2BP1                   | -0.4315657 | -1.0102529 | 0.5560470 | 0.1771116 | no hit            | no hit            |
| EIF3D                     | -0.4998896 | -0.8500947 | 0.5578465 | 0.3232649 | no hit            | no hit            |
| GGH                       | -0.1890147 | 0.0564856  | 0.5584220 | 0.8605734 | no hit            | no hit            |
| ERO1A                     | 0.3354980  | 0.4630809  | 0.5607380 | 0.4239533 | no hit            | no hit            |
| UBL3                      | 0.2265038  | 0.3035245  | 0.5615101 | 0.4382518 | no hit            | no hit            |
| TMED2                     | -0.2907201 | -0.3564787 | 0.5640917 | 0.4804389 | no hit            | no hit            |
| LMAN2                     | -0.2106224 | -0.1845720 | 0.5645599 | 0.6132973 | no hit            | no hit            |
| DDX1                      | -0.4124819 | -0.7219445 | 0.5669151 | 0.3207356 | no hit            | no hit            |

| gene_name | logFC_PA   | logFC_PE   | pvalue_PA | pvalue_PE | hit_annotation_PA | hit_annotation_PE |
|-----------|------------|------------|-----------|-----------|-------------------|-------------------|
| RAB6A     | -0.1664209 | -0.0169600 | 0.5672999 | 0.9533015 | no hit            | no hit            |
| SIGMAR1   | 0.2962249  | 0.4722193  | 0.5673811 | 0.3652529 | no hit            | no hit            |
| FUBP3     | -0.4103971 | -0.8228288 | 0.5684371 | 0.2591701 | no hit            | no hit            |
| IMPDH2    | 0.2808336  | 0.3462835  | 0.5700142 | 0.4846863 | no hit            | no hit            |
| HNRNPH1   | -0.3395556 | -0.2258633 | 0.5706895 | 0.7053390 | no hit            | no hit            |
| RAB2A     | -0.2076822 | -0.1124195 | 0.5709976 | 0.7583336 | no hit            | no hit            |
| ILF3      | -0.3088510 | -0.1062830 | 0.5719814 | 0.8452011 | no hit            | no hit            |
| ERGIC3    | -0.2366223 | -0.3786691 | 0.5732864 | 0.3706778 | no hit            | no hit            |
| TSPAN3    | -0.1988471 | -0.3616053 | 0.5750057 | 0.3127074 | no hit            | no hit            |
| CTSC      | -0.1696138 | 0.0799476  | 0.5753976 | 0.7910740 | no hit            | no hit            |
| ECE1      | 0.2436509  | 0.3316790  | 0.5767782 | 0.4490837 | no hit            | no hit            |
| RAB10     | 0.1196336  | 0.0514575  | 0.5799264 | 0.8111795 | no hit            | no hit            |
| SLC1A4    | 0.1957858  | 0.2219732  | 0.5804725 | 0.5314052 | no hit            | no hit            |
| DAD1      | 0.3187158  | 0.6055691  | 0.5823772 | 0.3013035 | no hit            | no hit            |
| ERAP1     | 0.2364970  | 0.6005637  | 0.5824052 | 0.1719888 | no hit            | no hit            |
| ERGIC1    | -0.1197406 | 0.0770924  | 0.5872175 | 0.7260678 | no hit            | no hit            |
| MVP       | -0.3002642 | -0.2576867 | 0.5889087 | 0.6424437 | no hit            | no hit            |
| ITGB5     | 0.1654753  | 0.0670563  | 0.5889623 | 0.8260941 | no hit            | no hit            |
| FEN1      | -0.3557630 | -0.5590130 | 0.5933270 | 0.4041246 | no hit            | no hit            |
| ABCE1     | -0.4342123 | -0.5719330 | 0.5938391 | 0.4836823 | no hit            | no hit            |
| RARS      | 0.2529848  | 0.4231013  | 0.5947519 | 0.3769824 | no hit            | no hit            |
| EIF3L     | -0.4397572 | -0.8659140 | 0.5954088 | 0.3011011 | no hit            | no hit            |
| RECQL     | -0.3839392 | -0.8720744 | 0.5962141 | 0.2361780 | no hit            | no hit            |
| ADAM15    | 0.1665389  | 0.4820007  | 0.6013394 | 0.1409790 | no hit            | no hit            |
| TMED4     | -0.2026178 | -0.1669862 | 0.6029584 | 0.6677787 | no hit            | no hit            |
| RACK1     | -0.3163594 | -0.8285872 | 0.6055898 | 0.1853885 | no hit            | no hit            |
| HNRNPM    | -0.2284365 | -0.1313169 | 0.6104499 | 0.7690945 | no hit            | no hit            |
| VAMP8     | 0.2013502  | -0.2019220 | 0.6123575 | 0.6113554 | no hit            | no hit            |
| EIF3B     | -0.3456909 | -0.6229093 | 0.6132557 | 0.3662121 | no hit            | no hit            |
| MOV10     | -0.2701311 | -0.6603730 | 0.6144185 | 0.2260206 | no hit            | no hit            |
| ATP6V0D1  | 0.1265341  | 0.0733311  | 0.6150837 | 0.7702152 | no hit            | no hit            |
| VAMP7     | -0.1345636 | -0.0231325 | 0.6183823 | 0.9315266 | no hit            | no hit            |
| TMED1     | -0.2071635 | -0.1182927 | 0.6201655 | 0.7766722 | no hit            | no hit            |
| SLC38A7   | -0.1965712 | 0.1262036  | 0.6209824 | 0.7504144 | no hit            | no hit            |
| NEU1      | 0.1858993  | 0.4126054  | 0.6236370 | 0.2822999 | no hit            | no hit            |
| LMNA      | -0.3391932 | -0.1354718 | 0.6244000 | 0.8445276 | no hit            | no hit            |
| SPTBN1    | 0.3289097  | 0.8697761  | 0.6251740 | 0.2050876 | no hit            | no hit            |
| CTNNA1    | 0.2857709  | -0.1691800 | 0.6273821 | 0.7733563 | no hit            | no hit            |
| EIF3H     | -0.3836413 | -0.9723089 | 0.6368290 | 0.2391415 | no hit            | no hit            |
| HEXB      | -0.2378309 | -0.1260650 | 0.6387268 | 0.8030471 | no hit            | no hit            |
| GALNT7    | -0.1505094 | 0.0871305  | 0.6409552 | 0.7867553 | no hit            | no hit            |
| ATP1B3    | 0.2190781  | 0.1101010  | 0.6514213 | 0.8200051 | no hit            | no hit            |
| ALDH7A1   | 0.2236469  | 0.4709680  | 0.6521379 | 0.3470851 | no hit            | no hit            |
| EIF3C     | -0.2961329 | -0.7628475 | 0.6553519 | 0.2574795 | no hit            | no hit            |
| TCP1      | 0.4514777  | 0.3813473  | 0.6560926 | 0.7065899 | no hit            | no hit            |
| SMC2      | -0.2794817 | -0.8232297 | 0.6566057 | 0.1994572 | no hit            | no hit            |
| HNRNPUL1  | -0.1974225 | -0.1817665 | 0.6611425 | 0.6864037 | no hit            | no hit            |
| EIF3E     | -0.2842945 | -0.7451165 | 0.6633951 | 0.2611863 | no hit            | no hit            |
| CCT5      | 0.4482578  | 0.2526310  | 0.6650111 | 0.8068653 | no hit            | no hit            |
| MYOF      | 0.1932061  | 0.1651339  | 0.6668746 | 0.7127568 | no hit            | no hit            |
| SLC7A6    | 0.1513299  | -0.0722096 | 0.6678963 | 0.8374706 | no hit            | no hit            |
| SLC7A5    | 0.1709859  | -0.1663057 | 0.6695683 | 0.6780564 | no hit            | no hit            |



| gene_name       | logFC_PA   | logFC_PE   | pvalue_PA | pvalue_PE | hit_annotation_PA | hit_annotation_PE |
|-----------------|------------|------------|-----------|-----------|-------------------|-------------------|
| HNRNPR          | -0.1750734 | -0.1816969 | 0.6715339 | 0.6599363 | no hit            | no hit            |
| RAB3D           | 0.1302096  | 0.2047058  | 0.6736617 | 0.5094630 | no hit            | no hit            |
| CSTB            | -0.1945916 | -0.4572256 | 0.6736634 | 0.3277294 | no hit            | no hit            |
| DDB1            | 0.1141053  | 0.2921831  | 0.6738516 | 0.2876371 | no hit            | no hit            |
| TMEM109         | 0.2182279  | 0.2585744  | 0.6739565 | 0.6184753 | no hit            | no hit            |
| MPDU1 HBEBP2BPA | 0.2067031  | 0.2904126  | 0.6740426 | 0.5555073 | no hit            | no hit            |
| PKN2            | 0.2695960  | 0.3285979  | 0.6749463 | 0.6096717 | no hit            | no hit            |
| VCP             | 0.2506833  | 0.5938006  | 0.6751043 | 0.3261464 | no hit            | no hit            |
| EPHX1           | 0.1923847  | 0.4878827  | 0.6782723 | 0.2989744 | no hit            | no hit            |
| POFUT1          | 0.1123747  | 0.5126925  | 0.6804018 | 0.0720001 | no hit            | no hit            |
| RPS21           | -0.1579725 | -0.9200207 | 0.6815525 | 0.0256978 | no hit            | no hit            |
| IGF2R           | 0.1628472  | 0.1507547  | 0.6816050 | 0.7039930 | no hit            | no hit            |
| CCT6A           | 0.4234097  | 0.3213645  | 0.6831860 | 0.7565114 | no hit            | no hit            |
| ALYREF          | -0.2216727 | 0.0557840  | 0.6838348 | 0.9181977 | no hit            | no hit            |
| LNPEP           | -0.1679683 | -0.1241197 | 0.6866621 | 0.7654046 | no hit            | no hit            |
| SEC23IP         | -0.3008969 | -0.8502318 | 0.6891947 | 0.2656788 | no hit            | no hit            |
| ABCB6           | 0.1280243  | 0.5408159  | 0.6910477 | 0.1049927 | no hit            | no hit            |
| SDCBP           | 0.1579079  | 0.5806899  | 0.6944958 | 0.1592729 | no hit            | no hit            |
| HNRNPD          | -0.1530716 | 0.0555533  | 0.6949514 | 0.8866181 | no hit            | no hit            |
| TMED9           | -0.2031202 | -0.1722856 | 0.6954228 | 0.7396826 | no hit            | no hit            |
| HSP90AB1        | -0.1497072 | -0.0897142 | 0.7006019 | 0.8175263 | no hit            | no hit            |
| DDR1            | 0.1085571  | -0.0233097 | 0.7048318 | 0.9350488 | no hit            | no hit            |
| RAB14           | -0.1168015 | -0.1611457 | 0.7085982 | 0.6067444 | no hit            | no hit            |
| TMEM106B        | 0.1905441  | 0.3989278  | 0.7094183 | 0.4382704 | no hit            | no hit            |
| CCT4            | 0.3877967  | 0.3081591  | 0.7116036 | 0.7687670 | no hit            | no hit            |
| SCARB2          | 0.2273036  | 0.4324196  | 0.7119085 | 0.4845055 | no hit            | no hit            |
| CCT3            | 0.3421406  | 0.2573196  | 0.7150574 | 0.7834786 | no hit            | no hit            |
| FASN            | -0.1526562 | -0.2757642 | 0.7181876 | 0.5161753 | no hit            | no hit            |
| SCPEP1          | -0.1711656 | -0.0589112 | 0.7251300 | 0.9035318 | no hit            | no hit            |
| PARP1           | 0.2223683  | 0.1464677  | 0.7261308 | 0.8173600 | no hit            | no hit            |
| HADHB           | 0.1485002  | 0.3449166  | 0.7287938 | 0.4240061 | no hit            | no hit            |
| RTCB            | -0.2222065 | -0.5982079 | 0.7288995 | 0.3557466 | no hit            | no hit            |
| NSUN2           | -0.1779332 | -0.6447477 | 0.7301176 | 0.2202538 | no hit            | no hit            |
| CTSA            | -0.1614620 | -0.1374767 | 0.7307816 | 0.7694417 | no hit            | no hit            |
| NCS1            | 0.1121921  | 0.2713215  | 0.7311936 | 0.4097841 | no hit            | no hit            |
| ARL6IP5         | 0.1643239  | 0.2463498  | 0.7320364 | 0.6084416 | no hit            | no hit            |
| GLA             | 0.1524022  | 0.3790152  | 0.7329649 | 0.4000791 | no hit            | no hit            |
| ALDH9A1         | -0.1314803 | 0.2161166  | 0.7359400 | 0.5803803 | no hit            | no hit            |
| RAB9A           | -0.0811041 | 0.0540906  | 0.7365420 | 0.8223089 | no hit            | no hit            |
| SND1            | -0.3123217 | -0.4387089 | 0.7411713 | 0.6431635 | no hit            | no hit            |
| RAB7A           | 0.0957545  | 0.2065882  | 0.7432851 | 0.4822033 | no hit            | no hit            |
| AHNAK           | 0.1050165  | 0.0956885  | 0.7474240 | 0.7691359 | no hit            | no hit            |
| GYS1            | -0.1905551 | -0.6397497 | 0.7494363 | 0.2904905 | no hit            | no hit            |
| TFRC            | -0.1011998 | 0.0034287  | 0.7522457 | 0.9914545 | no hit            | no hit            |
| NAGLU           | 0.0951769  | -0.0308454 | 0.7526414 | 0.9185460 | no hit            | no hit            |
| ATP6V1A         | 0.0742893  | -0.0399806 | 0.7530904 | 0.8654360 | no hit            | no hit            |
| ATP2C1          | -0.0894692 | -0.1061876 | 0.7535843 | 0.7096200 | no hit            | no hit            |
| DDR2            | -0.0790369 | -0.1574708 | 0.7537581 | 0.5336436 | no hit            | no hit            |
| RRBP1           | -0.1804930 | 0.0653534  | 0.7558633 | 0.9102602 | no hit            | no hit            |
| TMX1            | -0.1233157 | 0.0220703  | 0.7594880 | 0.9562475 | no hit            | no hit            |
| PROCR           | 0.1166713  | 0.3599981  | 0.7595767 | 0.3502955 | no hit            | no hit            |
| SLC38A1         | -0.1333432 | -0.3693581 | 0.7596577 | 0.4008171 | no hit            | no hit            |

| gene_name | logFC_PA   | logFC_PE   | pvalue_PA | pvalue_PE | hit_annotation_PA | hit_annotation_PE |
|-----------|------------|------------|-----------|-----------|-------------------|-------------------|
| EIF3I     | -0.1215991 | -0.9098980 | 0.7605745 | 0.0324603 | no hit            | no hit            |
| PSMB5     | -0.0850333 | -0.1225236 | 0.7613040 | 0.6620449 | no hit            | no hit            |
| PSAP      | -0.1355137 | -0.0082476 | 0.7637644 | 0.9853880 | no hit            | no hit            |
| PTBP1     | -0.1697549 | -0.6011508 | 0.7646098 | 0.2957882 | no hit            | no hit            |
| MYH9      | 0.1865761  | 0.2804252  | 0.7655799 | 0.6545573 | no hit            | no hit            |
| DNAJA1    | -0.2204496 | -0.5552552 | 0.7661762 | 0.4567880 | no hit            | no hit            |
| EPRS      | -0.1125805 | -0.1252850 | 0.7684147 | 0.7432274 | no hit            | no hit            |
| BANF1     | -0.0760968 | -0.4917480 | 0.7708271 | 0.0718836 | no hit            | no hit            |
| PKM       | -0.1189707 | 0.1021601  | 0.7719871 | 0.8034319 | no hit            | no hit            |
| CD97      | 0.1270715  | -0.0022931 | 0.7727485 | 0.9958372 | no hit            | no hit            |
| TPP1      | -0.1131493 | 0.1202320  | 0.7737645 | 0.7600598 | no hit            | no hit            |
| FAM49B    | 0.1053502  | -0.0407488 | 0.7764432 | 0.9124582 | no hit            | no hit            |
| CPA4      | 0.1315341  | 0.3069382  | 0.7779513 | 0.5125877 | no hit            | no hit            |
| AIMP1     | 0.0843026  | 0.2273129  | 0.7852047 | 0.4652897 | no hit            | no hit            |
| TOMM40    | 0.1558069  | 0.3128903  | 0.7962343 | 0.6050823 | no hit            | no hit            |
| ATP5L     | 0.1392492  | 0.5384218  | 0.7968649 | 0.3257173 | no hit            | no hit            |
| YARS      | 0.0936667  | 0.0917299  | 0.7984965 | 0.8025687 | no hit            | no hit            |
| HEXA      | -0.1304777 | 0.0904322  | 0.7994882 | 0.8601895 | no hit            | no hit            |
| LRP1      | -0.0884887 | -0.1882392 | 0.8024890 | 0.5957946 | no hit            | no hit            |
| PSMA6     | -0.0790482 | -0.1002187 | 0.8025318 | 0.7513365 | no hit            | no hit            |
| HFE       | -0.0633784 | -0.1349335 | 0.8126730 | 0.6148657 | no hit            | no hit            |
| CSRP1     | -0.1441540 | 0.3807524  | 0.8143225 | 0.5369149 | no hit            | no hit            |
| ARL8B     | -0.0789700 | -0.1170163 | 0.8170548 | 0.7319887 | no hit            | no hit            |
| SRP9      | -0.0628013 | -0.2270302 | 0.8244172 | 0.4263129 | no hit            | no hit            |
| PDLIM1    | 0.0628402  | 0.3823953  | 0.8247736 | 0.1882691 | no hit            | no hit            |
| SLC39A14  | 0.0772715  | -0.1539015 | 0.8265446 | 0.6631376 | no hit            | no hit            |
| PDCD4     | -0.1259747 | -0.4801519 | 0.8317181 | 0.4218920 | no hit            | no hit            |
| PPT1      | -0.0854106 | 0.0349463  | 0.8379196 | 0.9332663 | no hit            | no hit            |
| CDC2 CDK1 | -0.1187053 | -0.3084831 | 0.8424946 | 0.6067294 | no hit            | no hit            |
| CTSD      | -0.0898063 | -0.1605212 | 0.8463845 | 0.7294295 | no hit            | no hit            |
| GBA       | 0.0825128  | 0.2852768  | 0.8464854 | 0.5056893 | no hit            | no hit            |
| NSF       | -0.1223320 | -0.1084306 | 0.8513473 | 0.8680612 | no hit            | no hit            |
| SLC7A1    | -0.0636021 | -0.3317820 | 0.8565324 | 0.3512966 | no hit            | no hit            |
| VLDLR     | -0.0737174 | -0.3844171 | 0.8565649 | 0.3515650 | no hit            | no hit            |
| PRPF19    | 0.0708285  | 0.1949323  | 0.8592001 | 0.6263926 | no hit            | no hit            |
| ZDHHC20   | 0.0430560  | -0.1573023 | 0.8599042 | 0.5212706 | no hit            | no hit            |
| DHX9      | -0.1075302 | 0.2282740  | 0.8607339 | 0.7099837 | no hit            | no hit            |
| GALNT2    | 0.0812879  | 0.0380946  | 0.8675514 | 0.9376862 | no hit            | no hit            |
| PPA2      | 0.0608126  | 0.2148074  | 0.8682336 | 0.5595905 | no hit            | no hit            |
| RAB5C     | 0.0517004  | 0.1389822  | 0.8700332 | 0.6607945 | no hit            | no hit            |
| KPNA2     | 0.0419851  | 0.0983180  | 0.8709110 | 0.7040141 | no hit            | no hit            |
| SLC16A3   | -0.0699334 | -0.4148181 | 0.8714253 | 0.3429709 | no hit            | no hit            |
| ACP2      | 0.0928626  | 0.3662572  | 0.8763927 | 0.5415403 | no hit            | no hit            |
| HIST1H4A  | -0.1222180 | 0.2442689  | 0.8797828 | 0.7626573 | no hit            | no hit            |
| YIF1B     | -0.0600393 | -0.2527999 | 0.8836737 | 0.5398689 | no hit            | no hit            |
| PRKDC     | 0.0878348  | 0.0620125  | 0.8876082 | 0.9205066 | no hit            | no hit            |
| KHSRP     | -0.0261144 | -0.2753133 | 0.8918171 | 0.1629189 | no hit            | no hit            |
| IARS      | 0.0727343  | 0.2864244  | 0.8929414 | 0.5974649 | no hit            | no hit            |
| SLC3A2    | 0.0435545  | -0.0473317 | 0.9004529 | 0.8918751 | no hit            | no hit            |
| HNRNPU    | 0.0680859  | 0.2218324  | 0.9049979 | 0.6979303 | no hit            | no hit            |
| ILF2      | -0.0524385 | -0.1386280 | 0.9057428 | 0.7545349 | no hit            | no hit            |
| SEC22B    | -0.0333094 | -0.0596189 | 0.9063033 | 0.8332149 | no hit            | no hit            |

| gene_name | logFC_PA   | logFC_PE   | pvalue_PA | pvalue_PE | hit_annotation_PA | hit_annotation_PE |
|-----------|------------|------------|-----------|-----------|-------------------|-------------------|
| CLIC1     | -0.0262637 | -0.4724710 | 0.9088678 | 0.0510675 | no hit            | no hit            |
| CPD       | -0.0400661 | -0.2129421 | 0.9107310 | 0.5531499 | no hit            | no hit            |
| DDX5      | -0.0598607 | 0.3519765  | 0.9112142 | 0.5144844 | no hit            | no hit            |
| NPC1      | 0.0517273  | 0.2383349  | 0.9151675 | 0.6246705 | no hit            | no hit            |
| GLB1      | 0.0356149  | 0.2081011  | 0.9373261 | 0.6468527 | no hit            | no hit            |
| SERINC1   | 0.0357022  | 0.1605051  | 0.9426638 | 0.7467786 | no hit            | no hit            |
| PRSS56    | -0.0237832 | -0.1718653 | 0.9443177 | 0.6149892 | no hit            | no hit            |
| COTL1     | -0.0221659 | -0.2204299 | 0.9488216 | 0.5255920 | no hit            | no hit            |
| SRP14     | -0.0416633 | -0.0499319 | 0.9502728 | 0.9404222 | no hit            | no hit            |
| NAPG      | -0.0155178 | -0.3614983 | 0.9519423 | 0.1714763 | no hit            | no hit            |
| RAB4A     | 0.0141311  | -0.1636162 | 0.9522990 | 0.4914075 | no hit            | no hit            |
| ERP44     | 0.0170711  | -0.0037553 | 0.9549588 | 0.9900864 | no hit            | no hit            |
| IL6ST     | 0.0147408  | -0.0802392 | 0.9589332 | 0.7794830 | no hit            | no hit            |
| LAMP1     | -0.0208422 | 0.2776255  | 0.9605424 | 0.5124250 | no hit            | no hit            |
| EIF3J     | -0.0234196 | -0.5000801 | 0.9611731 | 0.3056907 | no hit            | no hit            |
| HSP90AA1  | -0.0190077 | -0.1032756 | 0.9632116 | 0.8022820 | no hit            | no hit            |
| SRP72     | 0.0201781  | 0.0322529  | 0.9688414 | 0.9502171 | no hit            | no hit            |
| FSCN1     | 0.0184615  | 0.2082420  | 0.9713632 | 0.6862032 | no hit            | no hit            |
| PRDX4     | -0.0146193 | 0.4215892  | 0.9714058 | 0.3083293 | no hit            | no hit            |
| STK26     | -0.0033419 | 0.0810178  | 0.9840069 | 0.6281173 | no hit            | no hit            |
| CD63      | 0.0088463  | 0.2716092  | 0.9888679 | 0.6691684 | no hit            | no hit            |
| SPTAN1    | 0.0098815  | 0.5237709  | 0.9892468 | 0.4781006 | no hit            | no hit            |
| LMAN1     | -0.0089397 | -0.0809709 | 0.9903722 | 0.9129827 | no hit            | no hit            |
| DDX17     | 0.0016574  | -0.1396869 | 0.9962328 | 0.6913271 | no hit            | no hit            |
| GAPDH     | 0.0024854  | -0.0249406 | 0.9968991 | 0.9688910 | no hit            | no hit            |
| RRAS      | 0.0003442  | 0.3152153  | 0.9991908 | 0.3586577 | no hit            | no hit            |
| HNRNPF    | -0.0001318 | -0.4538482 | 0.9998786 | 0.6018054 | no hit            | no hit            |
