# Supplementary material for: Trifunctional lipid derivatives: PE's mitochondrial interactome
Source: Royal Society of Chemistry journal article supplement (doi:10.1039/d4cc03599b), 2024-12-26
Supplement: d4cc03599b2.pdf [file d4cc03599b2.pdf]

### TF-PA

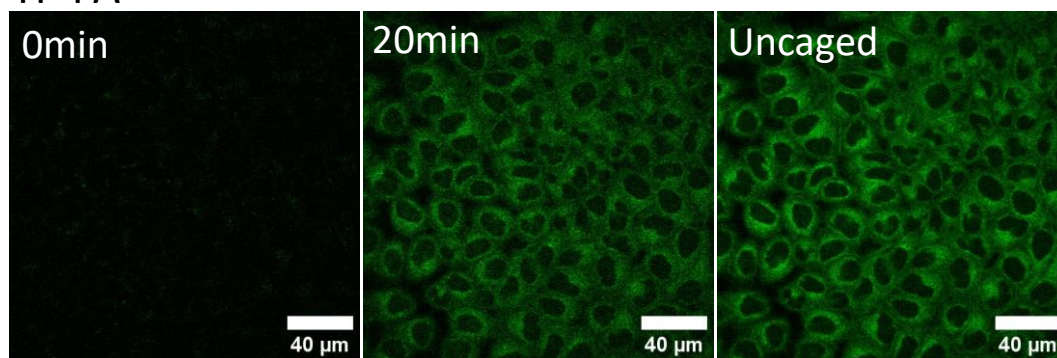

**Supplementary Figure 1.** Confocal micrograph showing loading of trifunctional PA (5  $\mu\text{M}$ ) derivatives into HeLa cells. Illumination of cells with 405 nm laser light (uncaging) led to a rapid increase of emission intensity due to the higher quantum yield of the released 7-diethylamino-4-hydroxymethyl-coumarin.

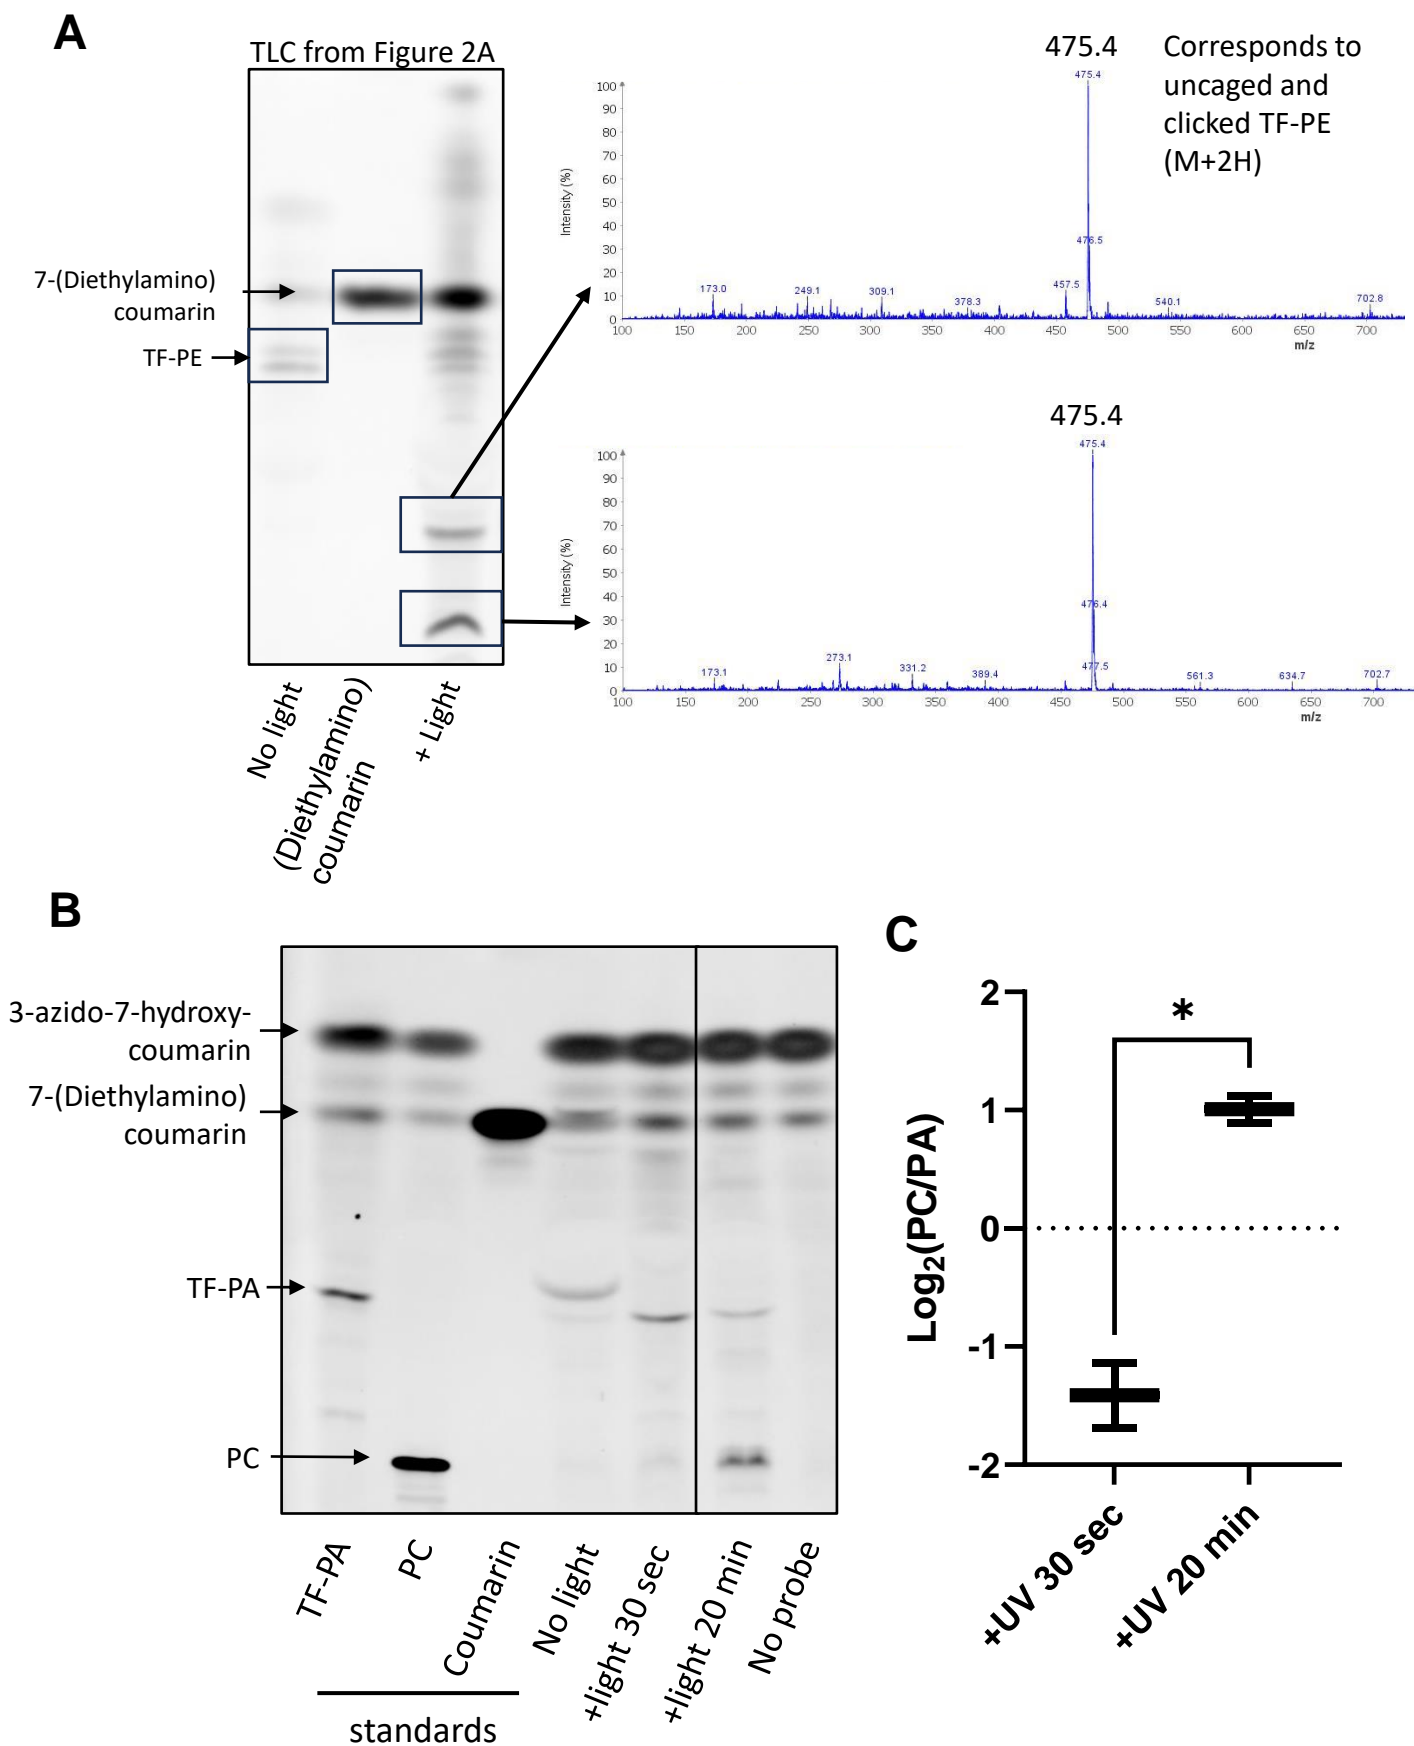

**Supplementary Figure 2. A.** Annotation of figure 2A is represented with ESI positive spectra of indicated TLC bands using direct TLC plate mass analysis with Plate Express from Advion. The peak at 475.4 corresponds to the predicted M+2H mass of uncaged TF-PE clicked with a 3-azido-7-hydroxy-coumarin. **B.** TLC (HPTLC silica 60) of the standards TF-PA (uncaged), alkyne PC and 7-(Diethylamino)coumarin in the first three lanes followed by lipid extracts from HeLa cells initially treated with 10  $\mu$ M of TF-PA derivative **2** with and without subsequent UV light irradiation and metabolization for the time indicated. Lipids were labeled with 3-azido-7-hydroxy-coumarin prior to TLC. 65:25:4:1 chloroform : methanol : water, acetic acid for 6 cm, followed by 1:1 hexanes : ethyl acetate for 9 cm. **C.** Integrated densities following background subtraction of lipid spots corresponding to PA and PC 30 sec or 20 min after light irradiation (from A). Two biological replicates.

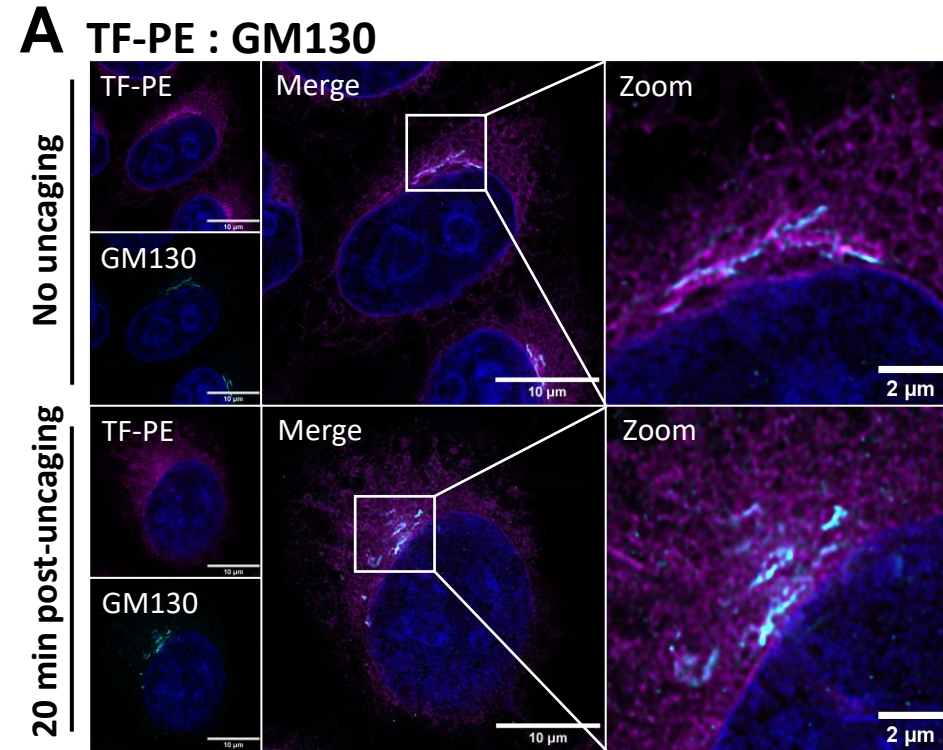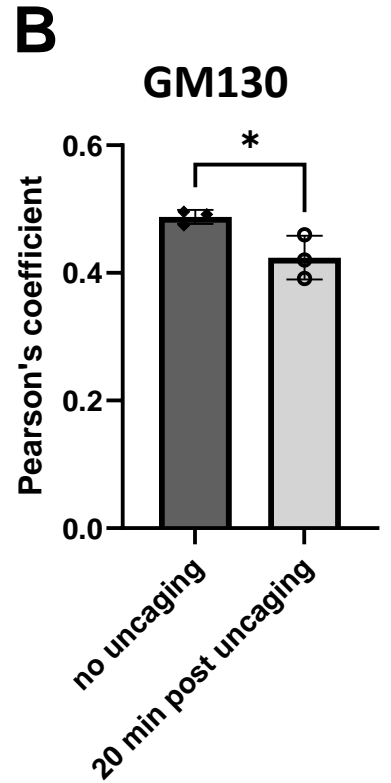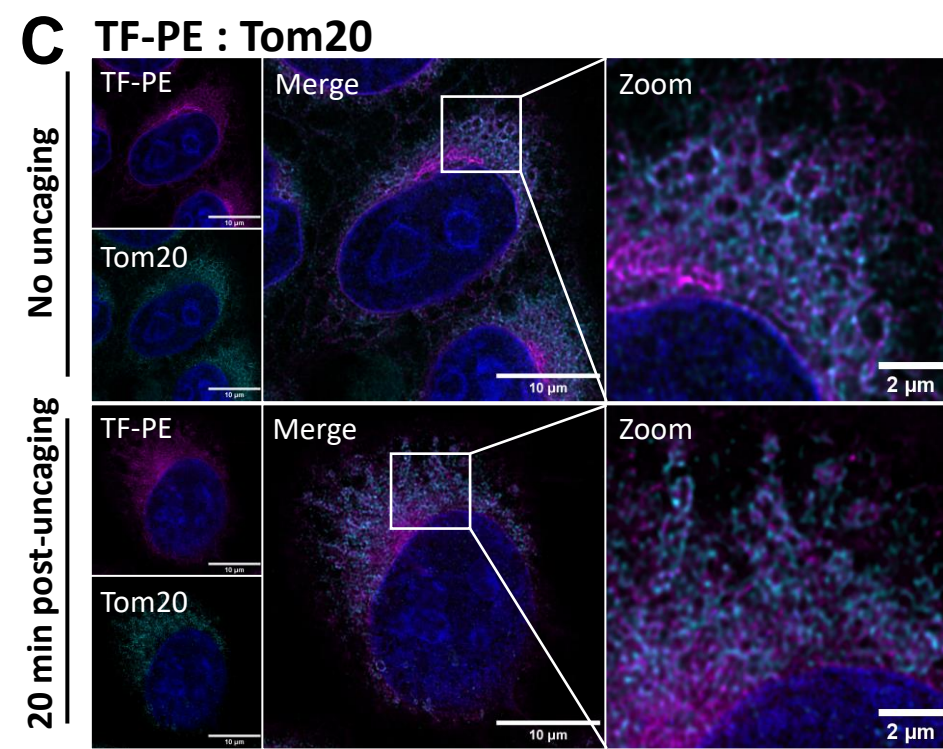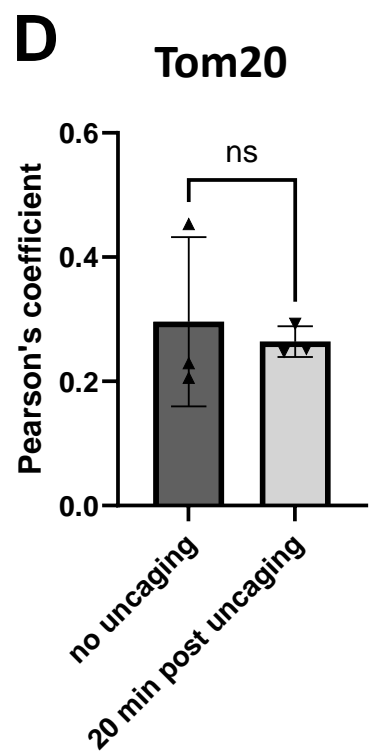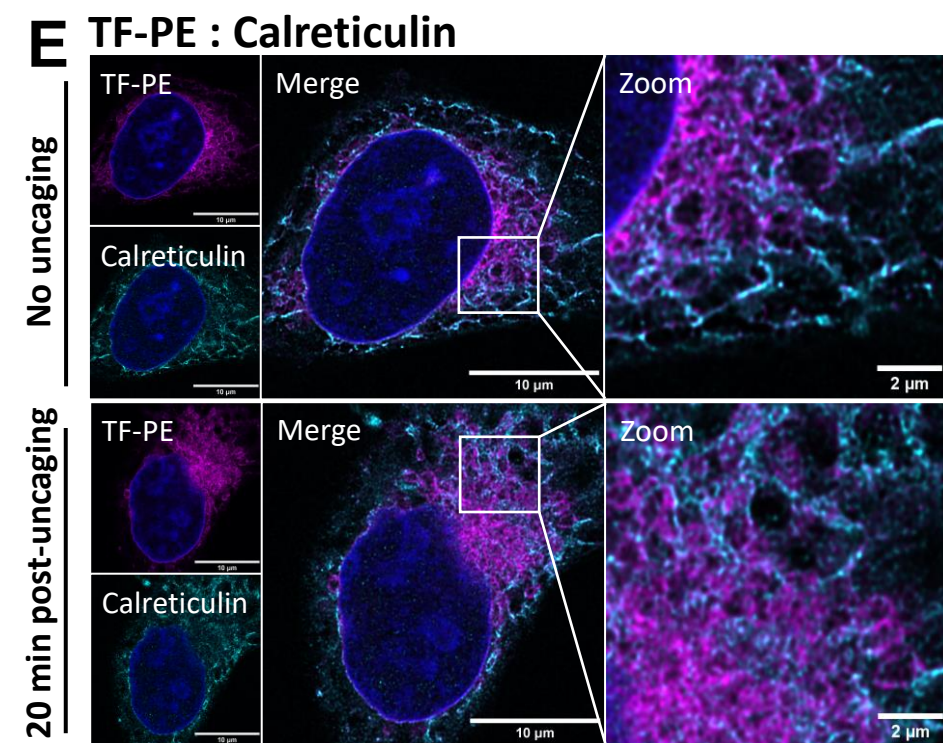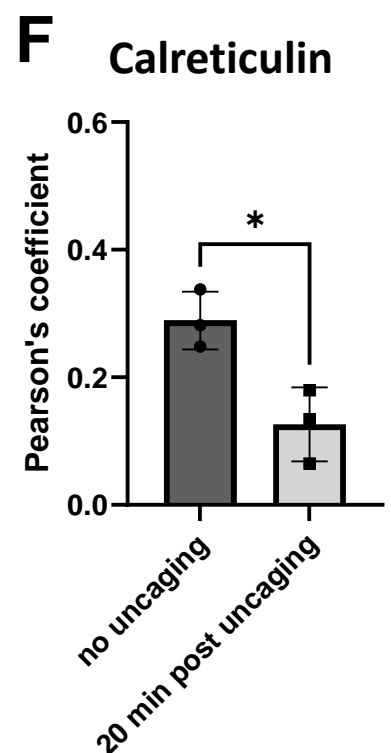

**Supplementary Figure 3.** A,C,E Confocal micrograph showing subcellular localization of lipid probes. HeLa cells were treated with 5 $\mu$ M of TF-PE and either incubated for 20 min and photo-crosslinked with 350 nm light or uncaged with 400 nm light and allowed to metabolized for 20 min prior to photo-crosslinking. The cells were then fixed, subjected to click reactions with a fluorescent azide (in magenta), and immuno-stained with the organelle markers (A) GM130 (Golgi), (B) Tom20 (Mitochondria), and (C) Calreticulin (ER)(in cyan). Images are representative of three independent experiments. The overlay of the two signals will appear white. B,D,F. Colocalization measurement using Pearson's coefficient between TF-PE and (B) GM130 (Golgi), (D) Tom20 (Mitochondria), and (F) Calreticulin (ER). Pearson's correlation coefficients were calculated using an ImageJ pipeline. Each experiment was performed in biological triplicates and 7 cells from different field of views were analyzed with Pearson per replicates. \* $p < 0.05$ , \*\* $p < 0.01$ , \*\*\* $p < 0.005$ , \*\*\*\* $p < 0.001$  (Unpaired t-test).

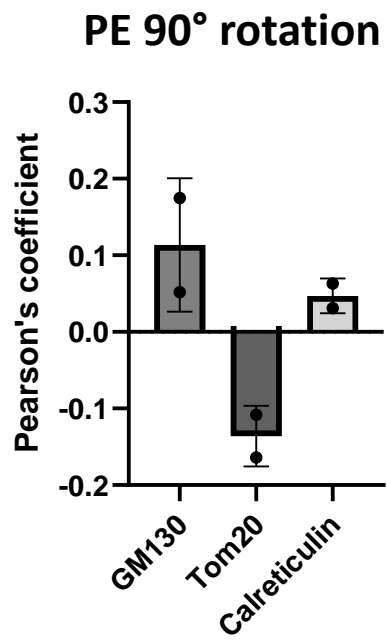

**Supplementary Figure 4.** Colocalization measurement using Pearson's coefficient between TF-PE after 90° rotation of the field of view and Calreticulin (ER), Tom20 (Mitochondria) or GM130 (Golgi)

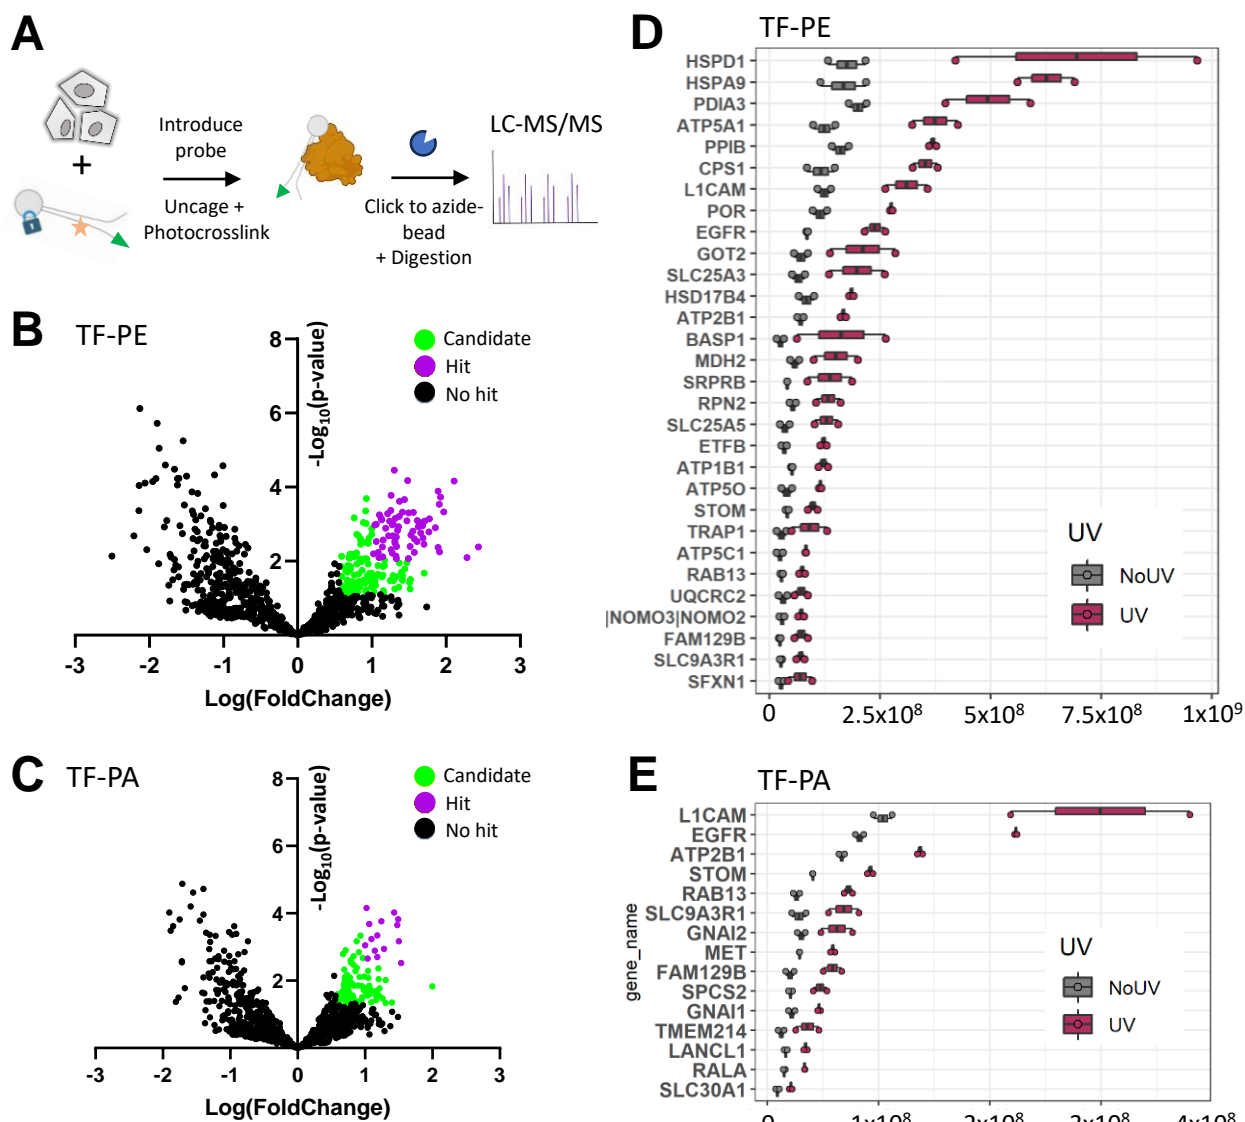

**Supplementary Figure 5. A.** Experimental design pipeline. **B-C.** Volcano plots of identified hit proteins for each probe, by Limma analysis. “Hits” are defined as proteins with a false discovery rate less than 0.05 and a fold change of at least 2-fold in the +UV over the -UV. “Candidates” are defined as proteins with a false discovery rate less than 0.2 and a fold change of at least 1.5-fold. **D-E.** Normalized intensities of proteins identified as hits by the Limma analysis for (E) TF-PE; (F) TF-PA.

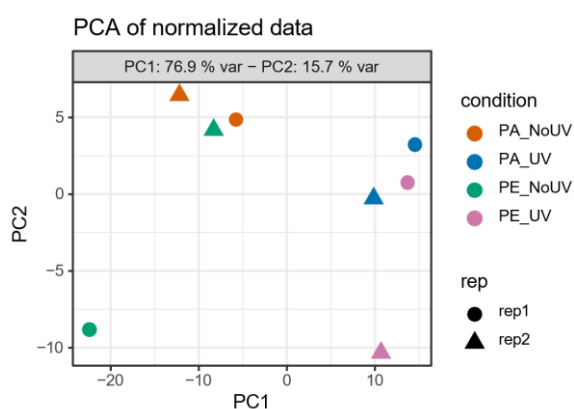

**Supplementary Figure 6.** PCA for quality control of lipid-protein interactome replicates. PCA was performed on the normalized protein abundance values. Each point represents a single replicate. The first two principal components account for 76.9% (PC1) and 15.7% (PC2) of the total variance.

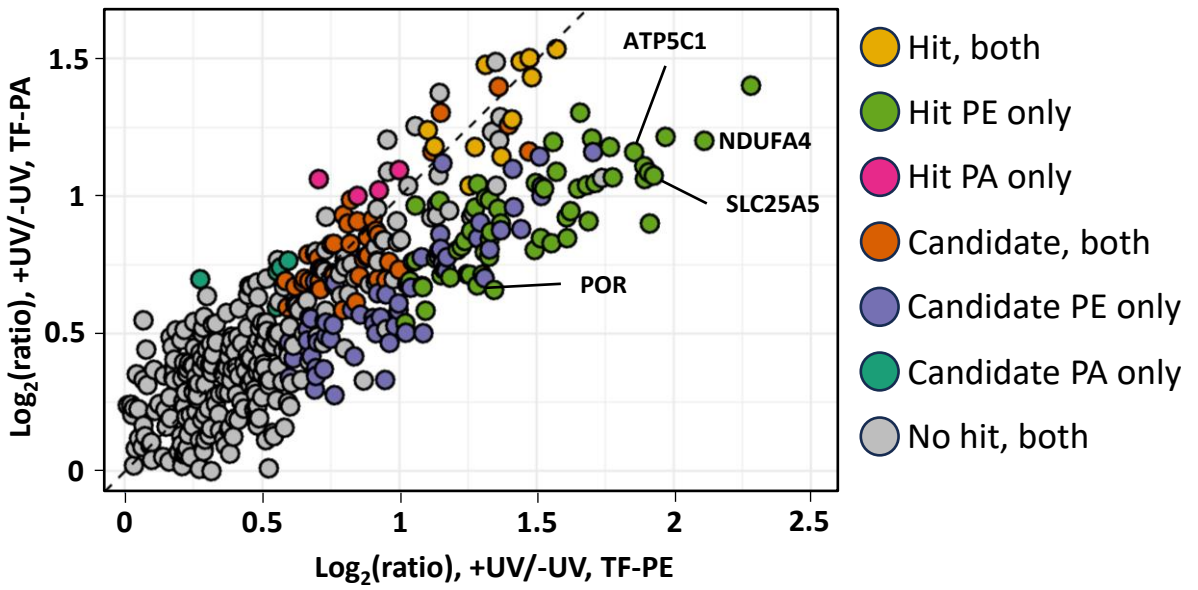

**Supplementary Figure 7.** Proteins pull down by TF-PA and TF-PE, colored by the degree of enrichment in the (+) UV condition over the (-) UV condition.  $\text{Log}_2(\text{ratio})$  values below 0 for both TF-PA and TF-PE were not included in the graph for clarity.

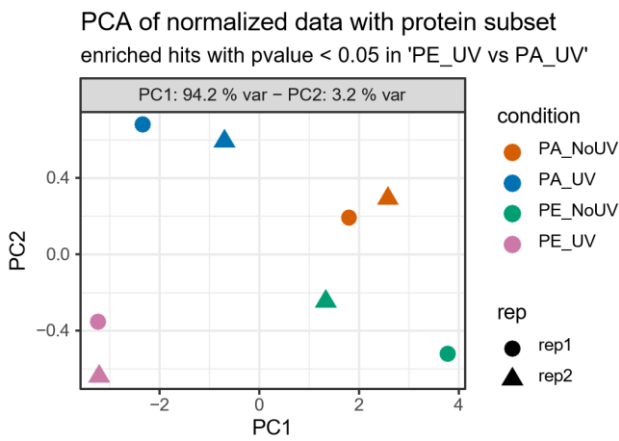

**Supplementary Figure 8.** PCA for quality control of lipid-protein interactome replicates. PCA was performed on a subset of proteins (ETFB, ATP5A1, ACAT1, TMEM214, SHMT2, GNB2, ATP5O, CS, OXCT1, PDIA3, AIFM1) corresponding to enriched hits with differences between the photo-crosslinked PE (PE\_UV) and the photo-crosslinked PA (PA\_UV). Each point represents a single replicate. The first two principal components account for 94.2% (PC1) and 3.2% (PC2) of the total variance.

**TF-PE : Mitochondrial hits**

| GO terms             | Gene              | logFC   | pvalue |
|----------------------|-------------------|---------|--------|
| respiratory chain    | NDUFA4            | 2.1094  | 0.0001 |
|                      | ETFB              | 1.8922  | 0.0001 |
|                      | ATP5C1            | 1.8541  | 0.0013 |
|                      | SDHA              | 1.6885  | 0.0024 |
|                      | ATP5O             | 1.6234  | 0.0012 |
|                      | ATP5A1            | 1.6104  | 0.0008 |
|                      | COX4I1            | 1.3285  | 0.0022 |
|                      | UQCRC2            | 1.2745  | 0.0061 |
|                      | ATP5F1            | 1.2247  | 0.0021 |
|                      | UQCRC1            | 1.1517  | 0.0027 |
| metabolic pathways   | CS                | 2.2800  | 0.0080 |
|                      | FH                | 1.9067  | 0.0003 |
|                      | SHMT2             | 1.8917  | 0.0043 |
|                      | PDHB              | 1.7764  | 0.0007 |
|                      | SDHA              | 1.6885  | 0.0024 |
|                      | ACAT1             | 1.6812  | 0.0011 |
|                      | CPS1              | 1.6496  | 0.0009 |
|                      | ECH1              | 1.5722  | 0.0058 |
|                      | GOT2              | 1.5142  | 0.0040 |
|                      | OXCT1             | 1.3439  | 0.0015 |
|                      | MDH2              | 1.3315  | 0.0040 |
|                      | protein transport | SLC25A5 | 1.9266 |
| SLC25A6              |                   | 1.7670  | 0.0016 |
| SLC25A3              |                   | 1.5530  | 0.0016 |
| SFXN1                |                   | 1.3278  | 0.0085 |
| gene regulation      | HSPD1             | 1.9122  | 0.0056 |
|                      | TRAP1             | 1.7001  | 0.0035 |
|                      | PPIF              | 1.6091  | 0.0030 |
|                      | SLIRP             | 1.4909  | 0.0086 |
|                      | TRMT10C           | 1.3265  | 0.0073 |
| redox and apoptosis  | AIFM1             | 1.7120  | 0.0008 |
|                      | SCCPDH            | 1.0578  | 0.0029 |
| Biosynthesis of Fe/S | HSPA9             | 1.9696  | 0.0005 |
|                      | ACO2              | 1.0844  | 0.0058 |

**Supplementary Figure 9.** Table summarizing mitochondrial proteins identified as enriched hits for TF-PE. Proteins are ordered by logFC values within each of the color-coded GO mitochondrial biological process categories.
